# Supplementary material for: The Unexpected Selectivity Switching from Mitochondria to Lysosome in a D-π-A Cyanine Dye
Source: MDPI journal article supplement (doi:10.3390/bios12070504), 2022-07-10
Supplement: s1 [file s1]

# **The Donor-Induced Unexpected Selectivity Switching from Mitochondria to Lysosome in a Cyanine Dye**

## **Supporting Information**

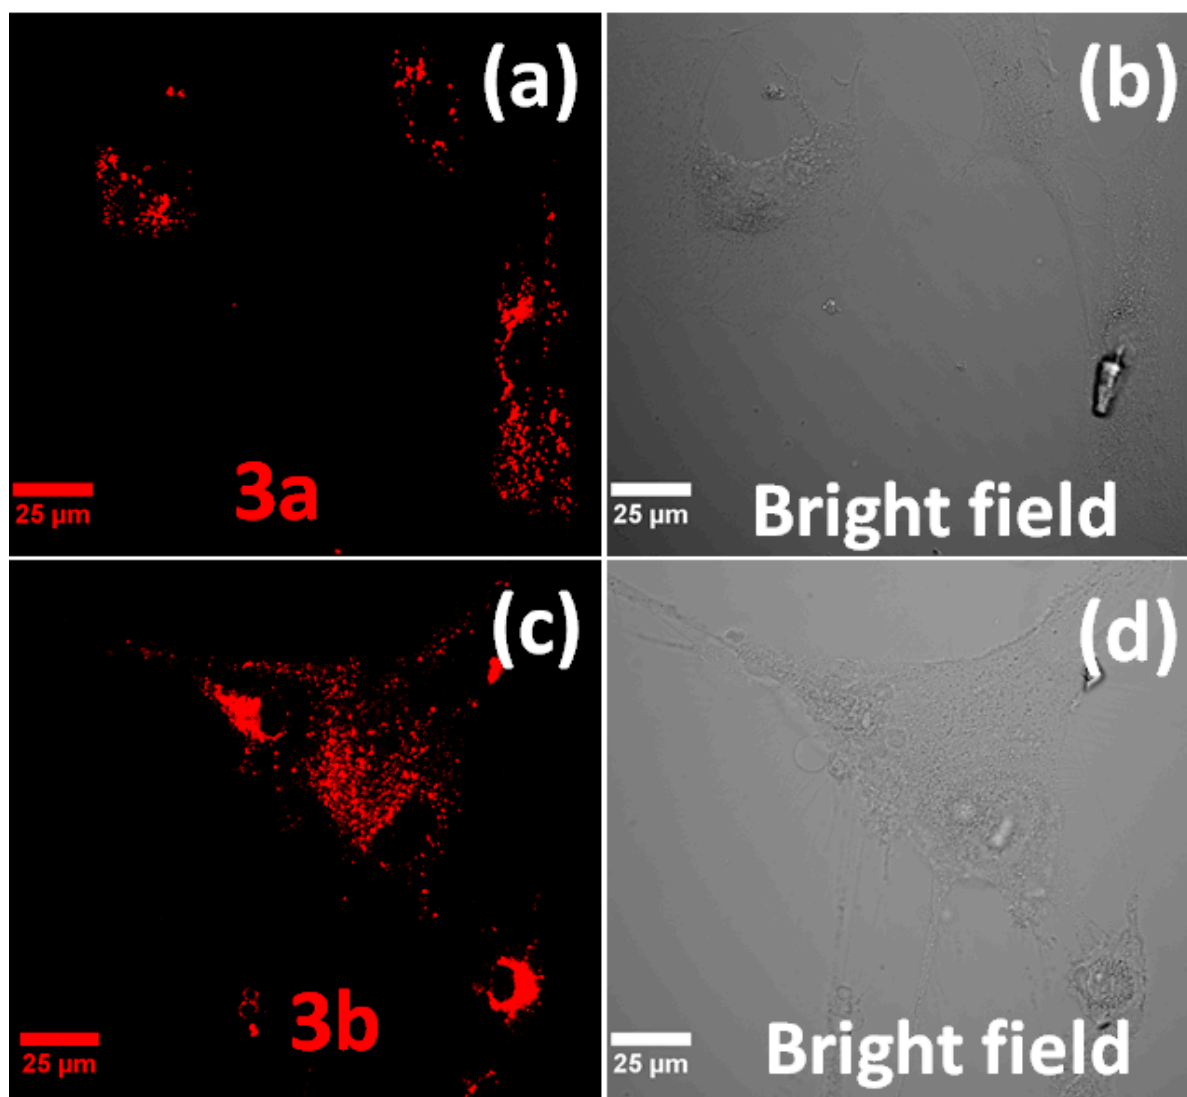

**Figure S1** Fluorescence confocal microscopy images obtained from NHLF cells pre-incubated with probe **3a** (200 nM) and **3b** (200 nM) for 30 minutes. Images a-d represents, probe **3a** emission within the cells (a), bright field (b), probe **3b** emission within the cells (c) and bright field (d). Probe **3a** and **3b** were excited with 561 nm laser line and the emission filter setting were set up to collect from 575 – 750 nm range.

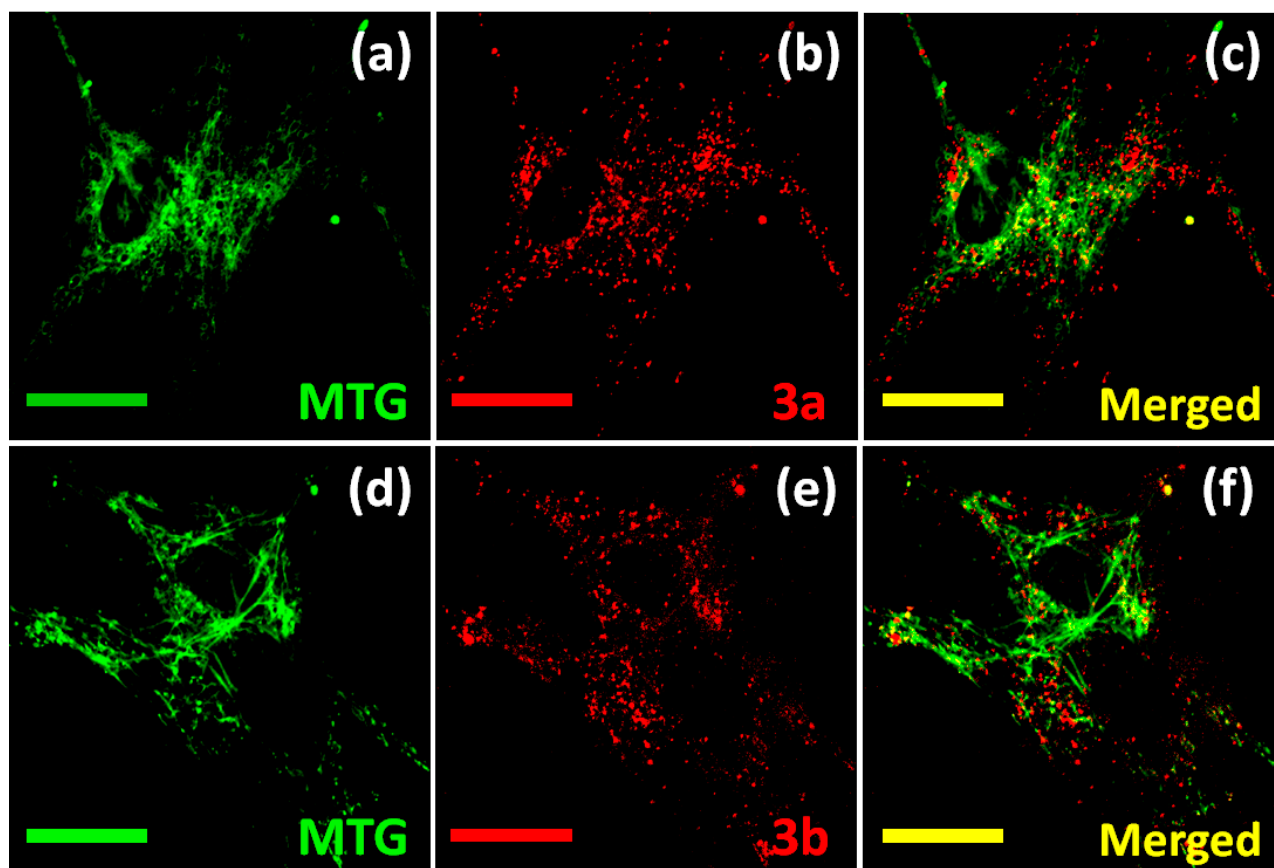

**Figure S2** Fluorescence confocal microscopy images of the MO3.13 cells incubated with probe **3a** (200 nM) and **3b** (200 nM) for 30 minutes in the presence of MitoTracker™ Green FM (200 nM). Figures a and d represents the staining of the MitoTracker™ Green, figures b and e represents the staining of the probe **3a** and **3b** respectively. Figures c and f represents the composite images. Probe **3a** and **3b** were excited with 561 nm laser line and the MitoTracker™ Green was excited with 488 nm laser line. Calculate Mander's overlap coefficients found to be 0.27 (**3a**) and 0.24 (**3b**). The emission filter settings were set up to collect from 495-530 nm (MitoTracker™ Green) and 575 – 750 nm (**3**) respectively.

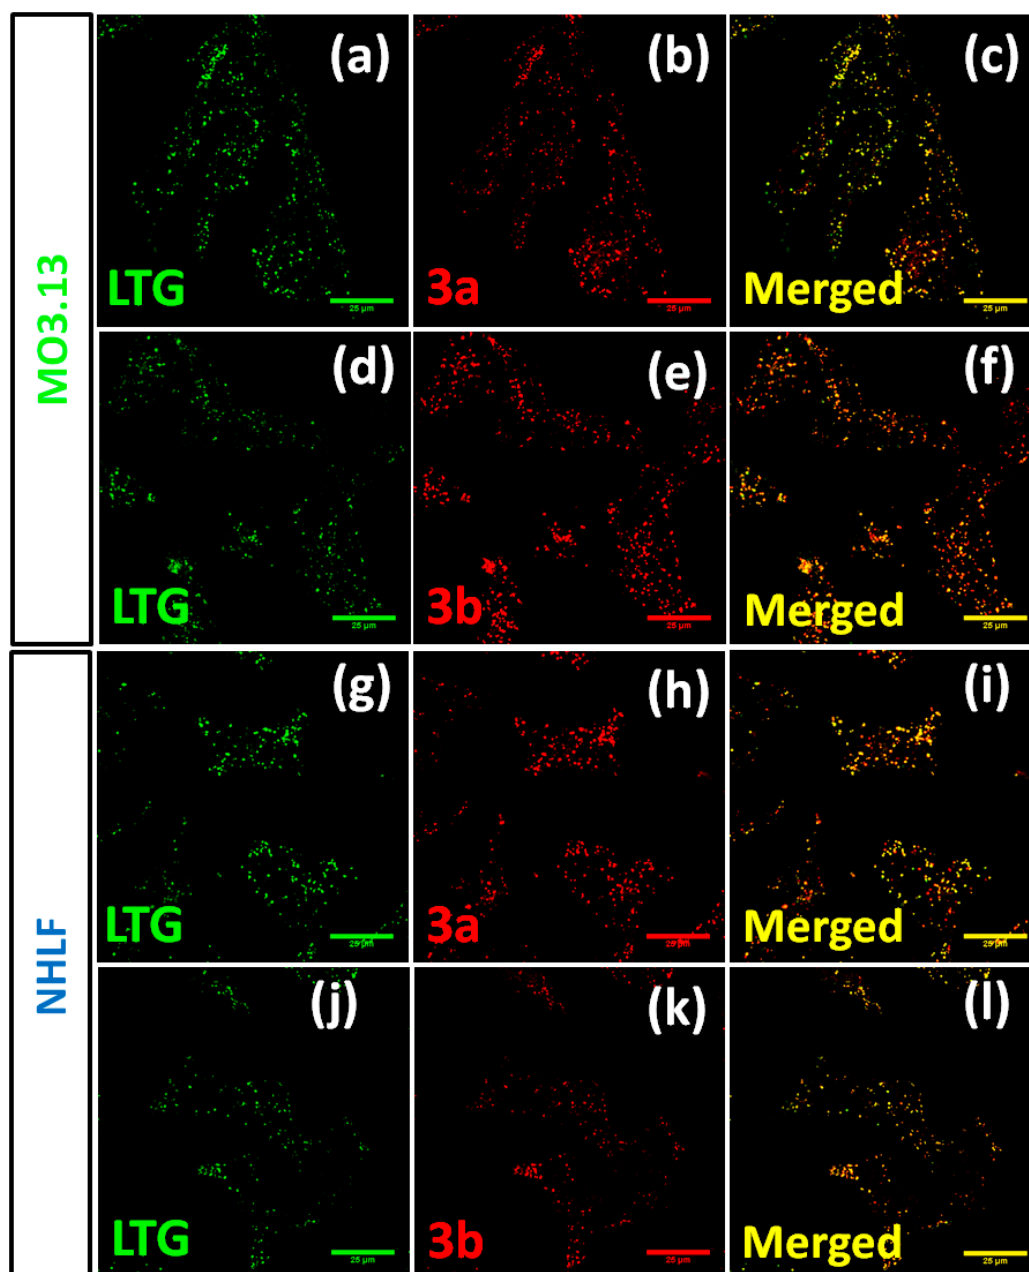

**Figure S3** Fluorescence confocal microscopy images of the MO3.13 cells (figures a – f) and NHLF cells (figures g – l) incubated with probe **3a** (200 nM) and **3b** (200 nM) for 30 minutes in the presence of LysoTracker™ Green DND-26 (70 nM). Figures a,d,g and j represents the staining of the LysoTracker™ Green, figures b and h represents the staining of the probe **3a**, figures e and k represents the staining of probe **3b** and figures c, f, i, and l represents the relevant composite images. Probe **3a** and **3b** were excited with 561 nm laser line and the LysoTracker™ Green was excited with 488 nm laser line. Calculate Mander's overlap coefficient for **3a** found to be 0.91 (MO3.13) and 0.94 (NHLF). Calculated Mander's overlap coefficient for **3b** found to be 0.89 (MO3.13) and 0.93 (NHLF). The emission filter settings were set up to collect from 495-530 nm (LysoTracker™ Green) and 575 – 750 nm (**3**) respectively.



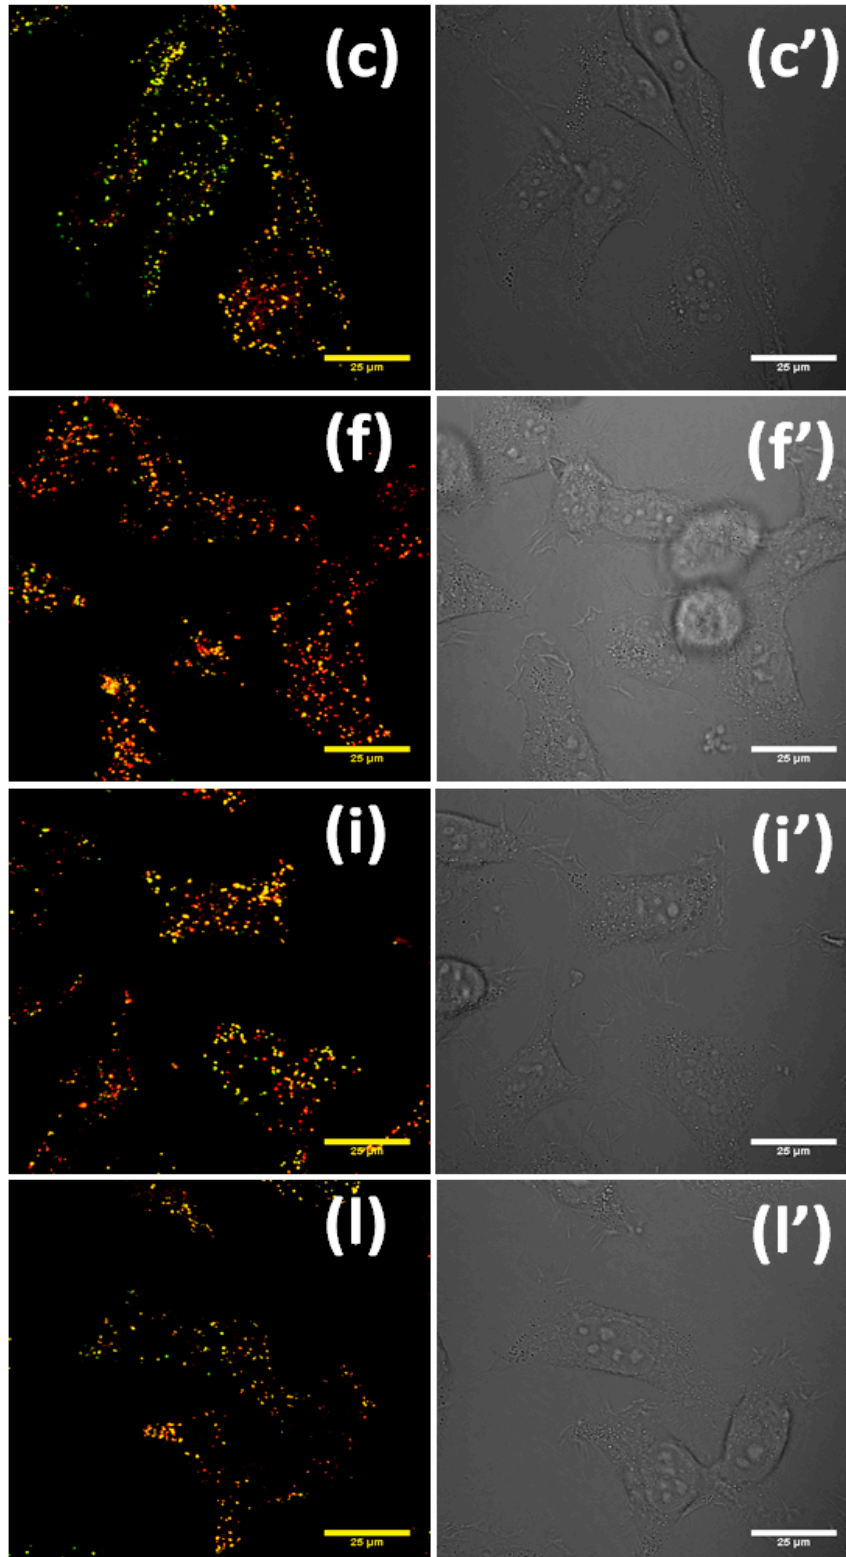

**Figure S4** Represents the corresponding bright field images (c', f', i' and l') for each composite image presented in figure S3 (c, f, i and l).

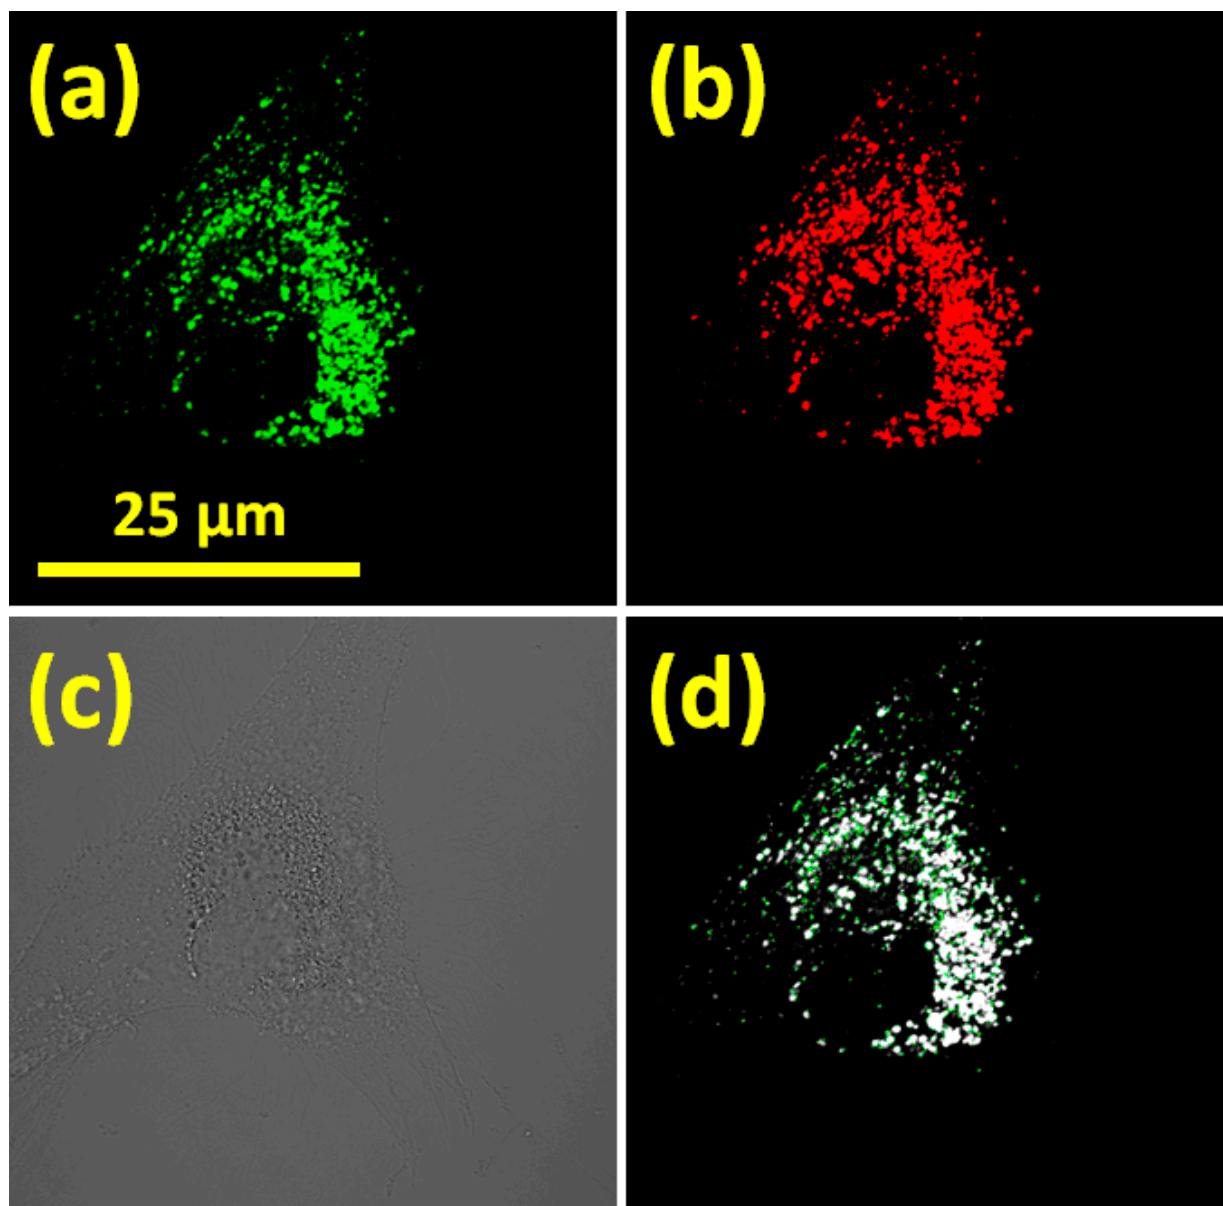

**Figure S5.1** Colocalization analysis for the fluorescence confocal microscopy images obtained for probe **3a** (200 nM) in MO3.13 cells with LysoTracker™ Green DND-26 (70 nM). Images from a to c represents, the staining pattern of the LysoTracker™ Green DND-26 (a), staining pattern of the probe **3a** (b) and the bright field image (c). Image d represents the digital co-localization analysis performed for probe **3a** and LysoTracker™ Green DND-26 by ImageJ (NIH) software. The grey/white area represents the perfect overlap region. The calculated Mander's overlap coefficient for the analysis is 0.89.

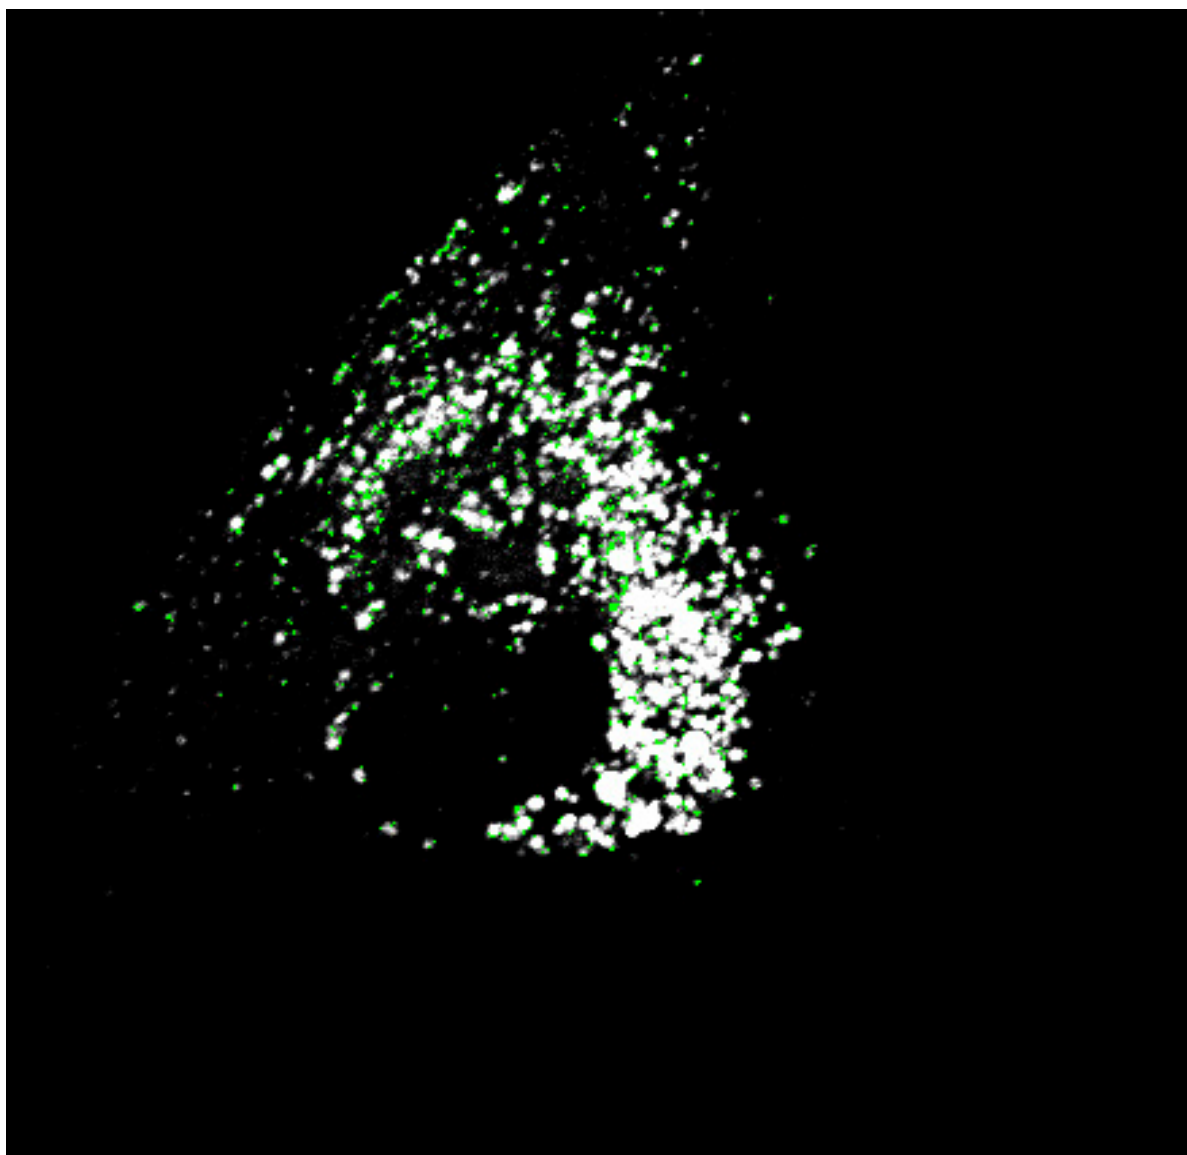

**Figure S5.2** Represents the zoomed-in version of the figure S5.1d for digital co-localization analysis performed for probe **3a** and LysoTracker™ Green DND-26 by ImageJ (NIH) software. The grey/white area represents the perfect overlap region. The calculated Mander's overlap coefficient for the analysis is 0.89.

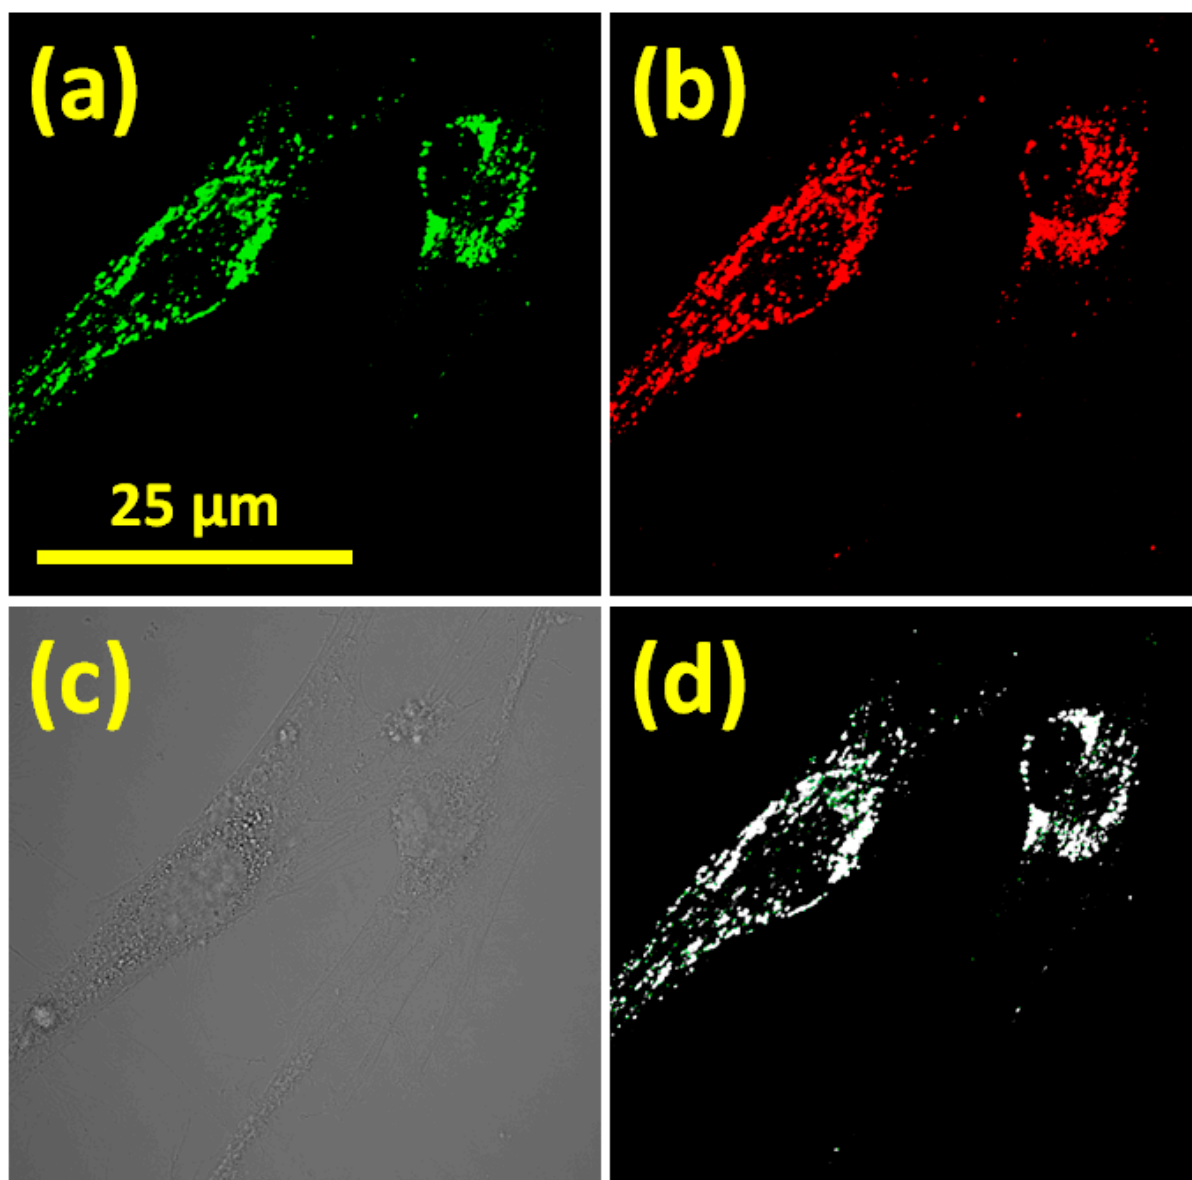

**Figure S5.3** Colocalization analysis for the fluorescence confocal microscopy images obtained for probe **3b** (200 nM) in MO3.13 cells with LysoTracker™ Green DND-26 (70 nM). Images from a to c represents, the staining pattern of the LysoTracker™ Green DND-26 (a), staining pattern of the probe **3b** (b) and the bright field image (c). Image d represents the digital co-localization analysis performed for probe **3b** and LysoTracker™ Green DND-26 by ImageJ (NIH) software. The grey/white area represents the perfect overlap region. The calculated Mander's overlap coefficient for the analysis is 0.91.

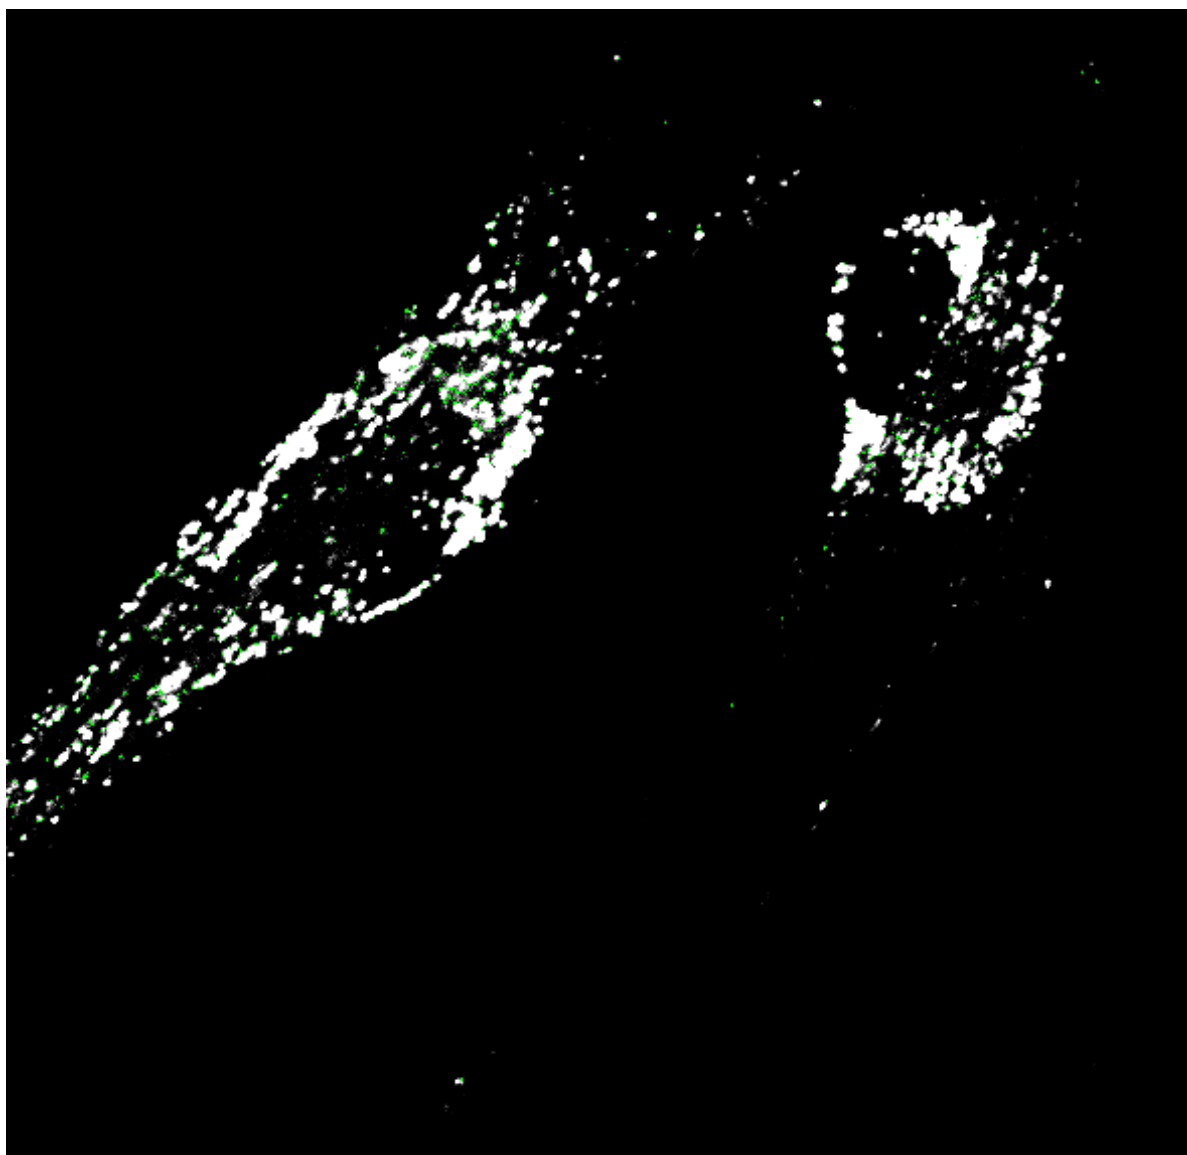

**Figure S5.4** Represents the zoomed-in version of the figure S5.3d for digital co-localization analysis performed for probe **3b** and LysoTracker™ Green DND-26 by ImageJ (NIH) software. The grey/white area represents the perfect overlap region. The calculated Mander's overlap coefficient for the analysis is 0.91.

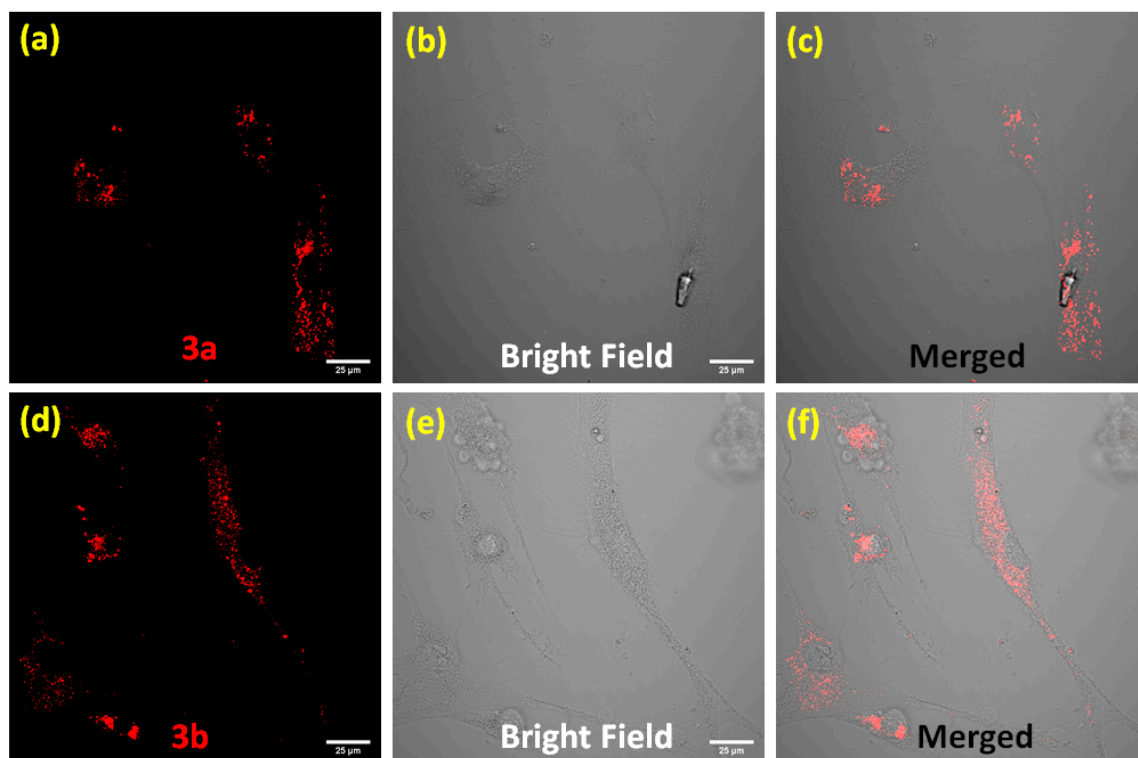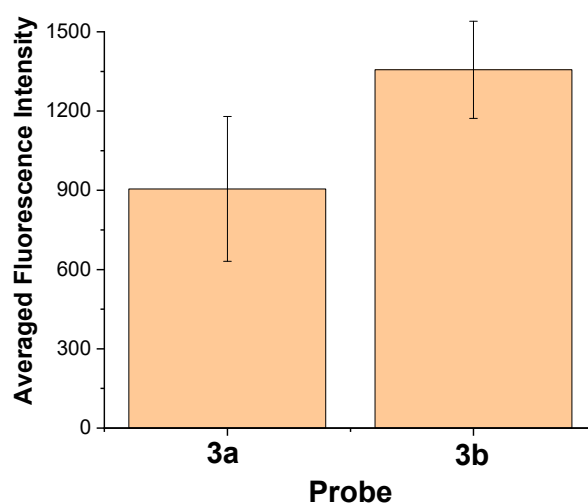

**Figure S5.5** Representative fluorescence confocal microscopy images of MO3.13 cells incubated with 200nM probe **3a** (a-c) and **3b** (d-f). The merged images c and f were processed by combining the probe **3a-3b** images with their respective bright filed images to represent the cellular boundary.

The bar-chart represents the averages fluorescence intensity calculated from the MO3.13 cells stained with 200nM probe **3a** and **3b**. The averaged fluorescence intensity was calculated by ImageJ(NIH) software with two set of replicates ( $2 \times n$ ; where  $n=15$ )

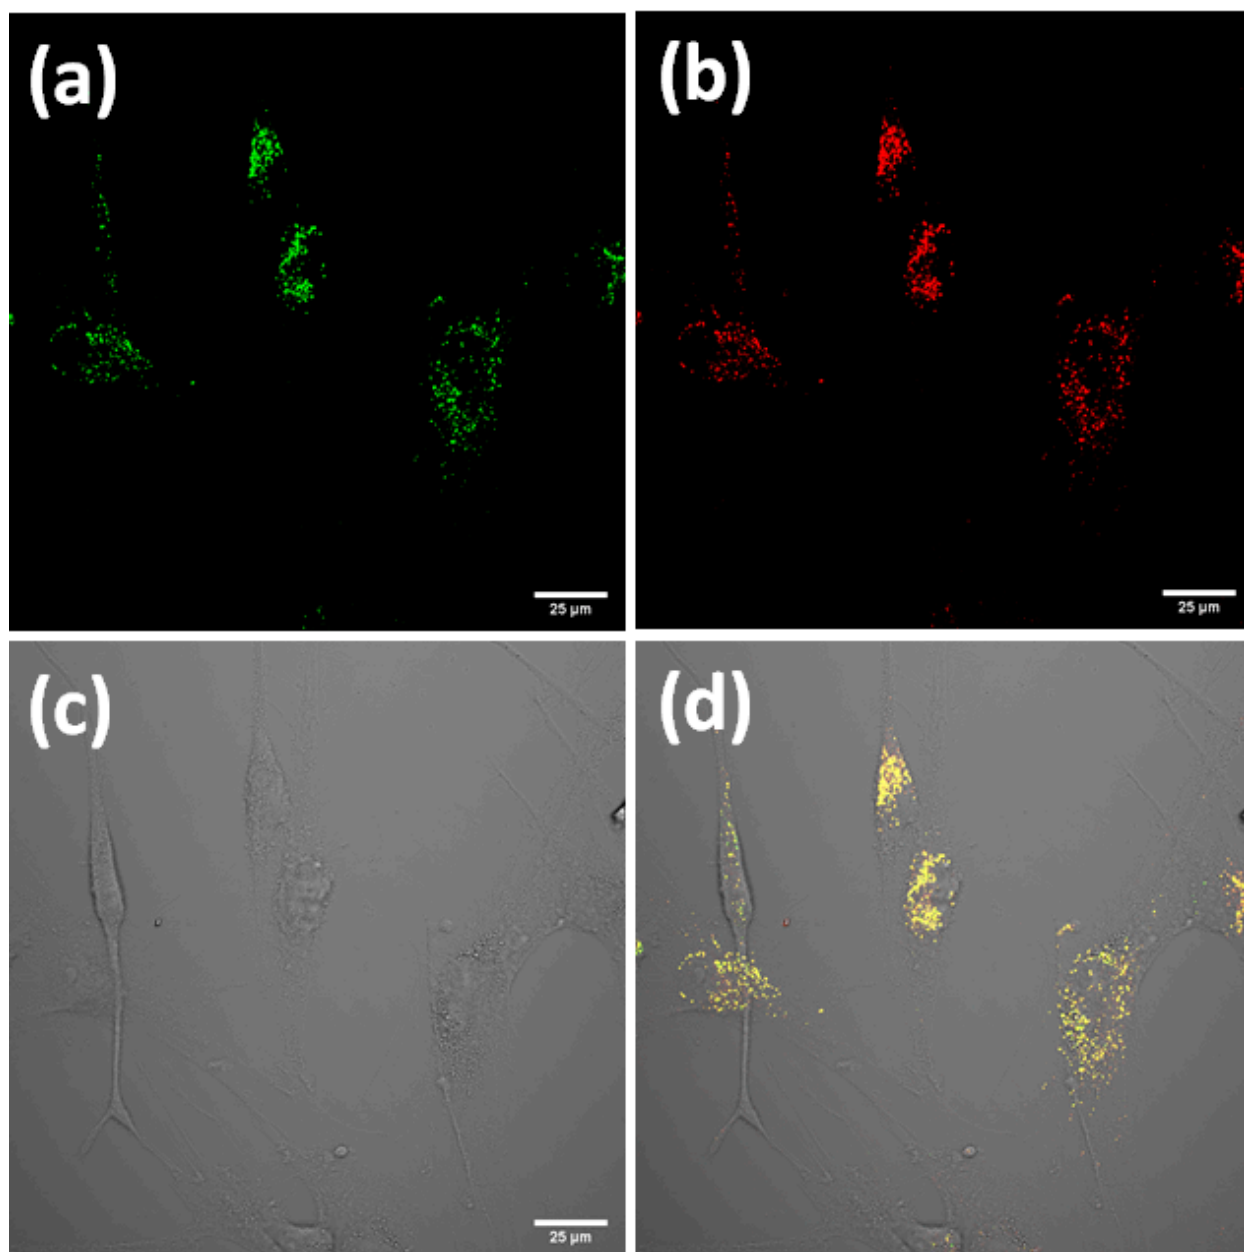

**Figure S5.6** Representative fluorescence confocal microscope images of the MO3.13 cells incubated with probe **3b** (200 nM) for 30 minutes in the presence of LysoTracker™ Green DND-26 (70 nM). Probe **3b** was excited with 561 nm laser line and the LysoTracker™ Green was excited with 488 nm laser line. The emission filter settings were set up to collect from 495-530 nm (LysoTracker™ Green) and 575 – 750 nm (**3b**) respectively.

Figures represents the staining of the LysoTracker™ Green DND-26 (a), staining of the probe **3b** (b), bright filed image (c) and composite image to represent the cellular boundaries(d).



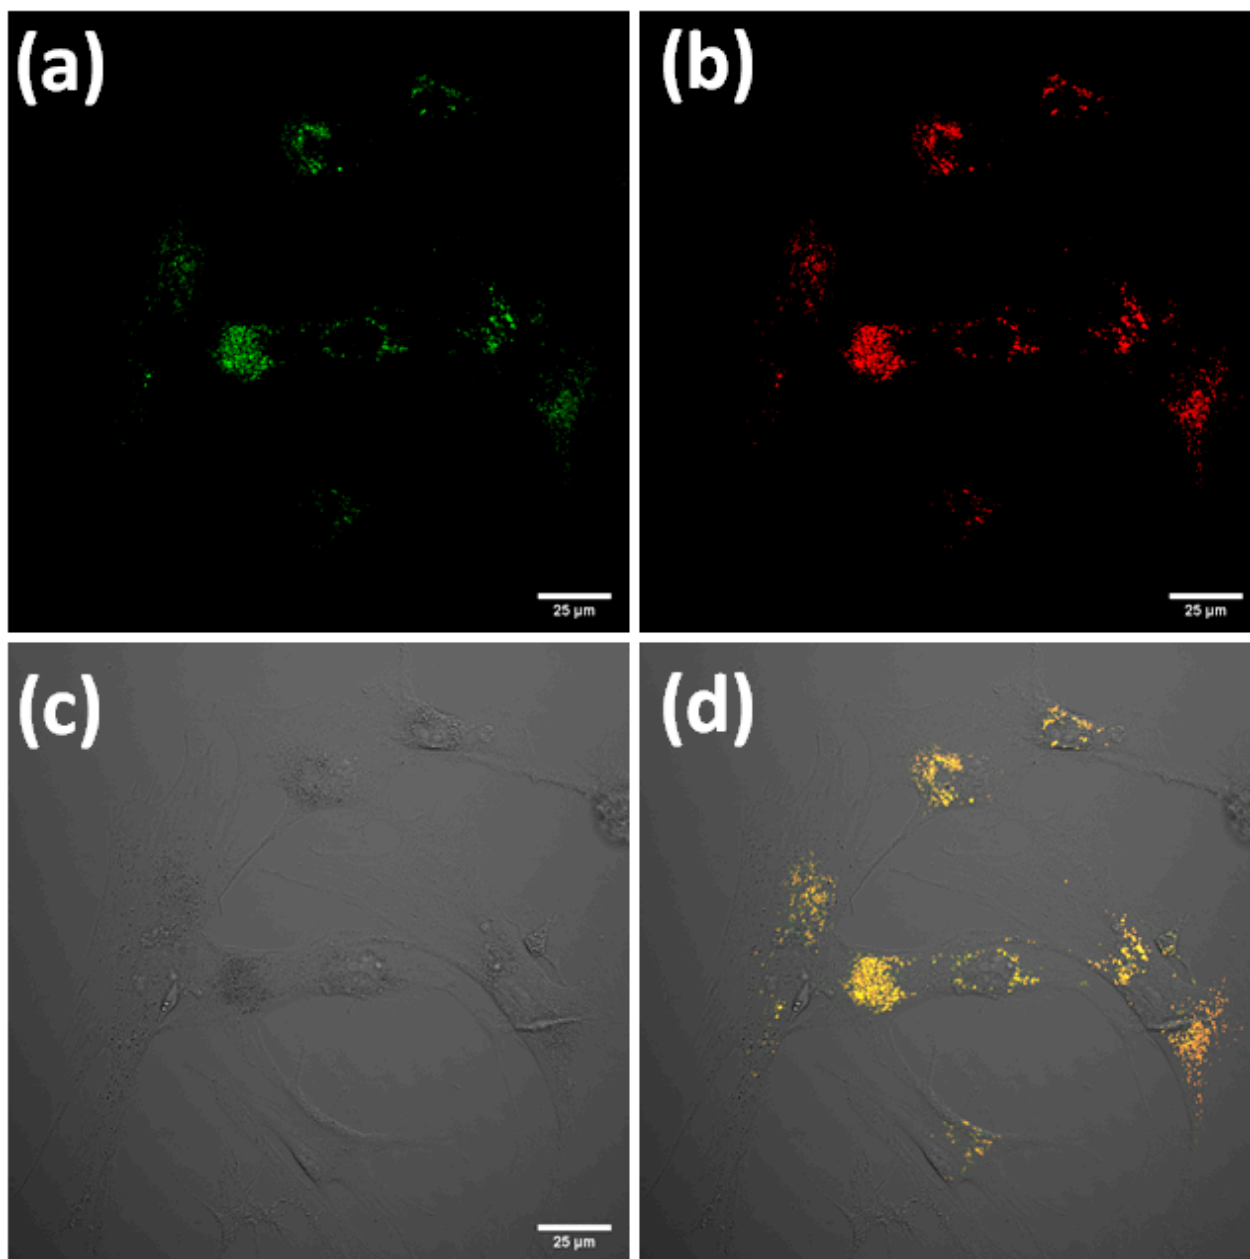

**Figure S5.7** Representative fluorescence confocal microscope images of the MO3.13 cells incubated with probe **3a** (200 nM) for 30 minutes in the presence of LysoTracker™ Green DND-26 (70 nM). Probe **3a** was excited with 561 nm laser line and the LysoTracker™ Green was excited with 488 nm laser line. The emission filter settings were set up to collect from 495-530 nm (LysoTracker™ Green) and 575 – 750 nm (**3a**) respectively.

Figures represents the staining of the LysoTracker™ Green DND-26 (a), staining of the probe **3a** (b), bright filed image (c) and composite image to represent the cellular boundaries(d).



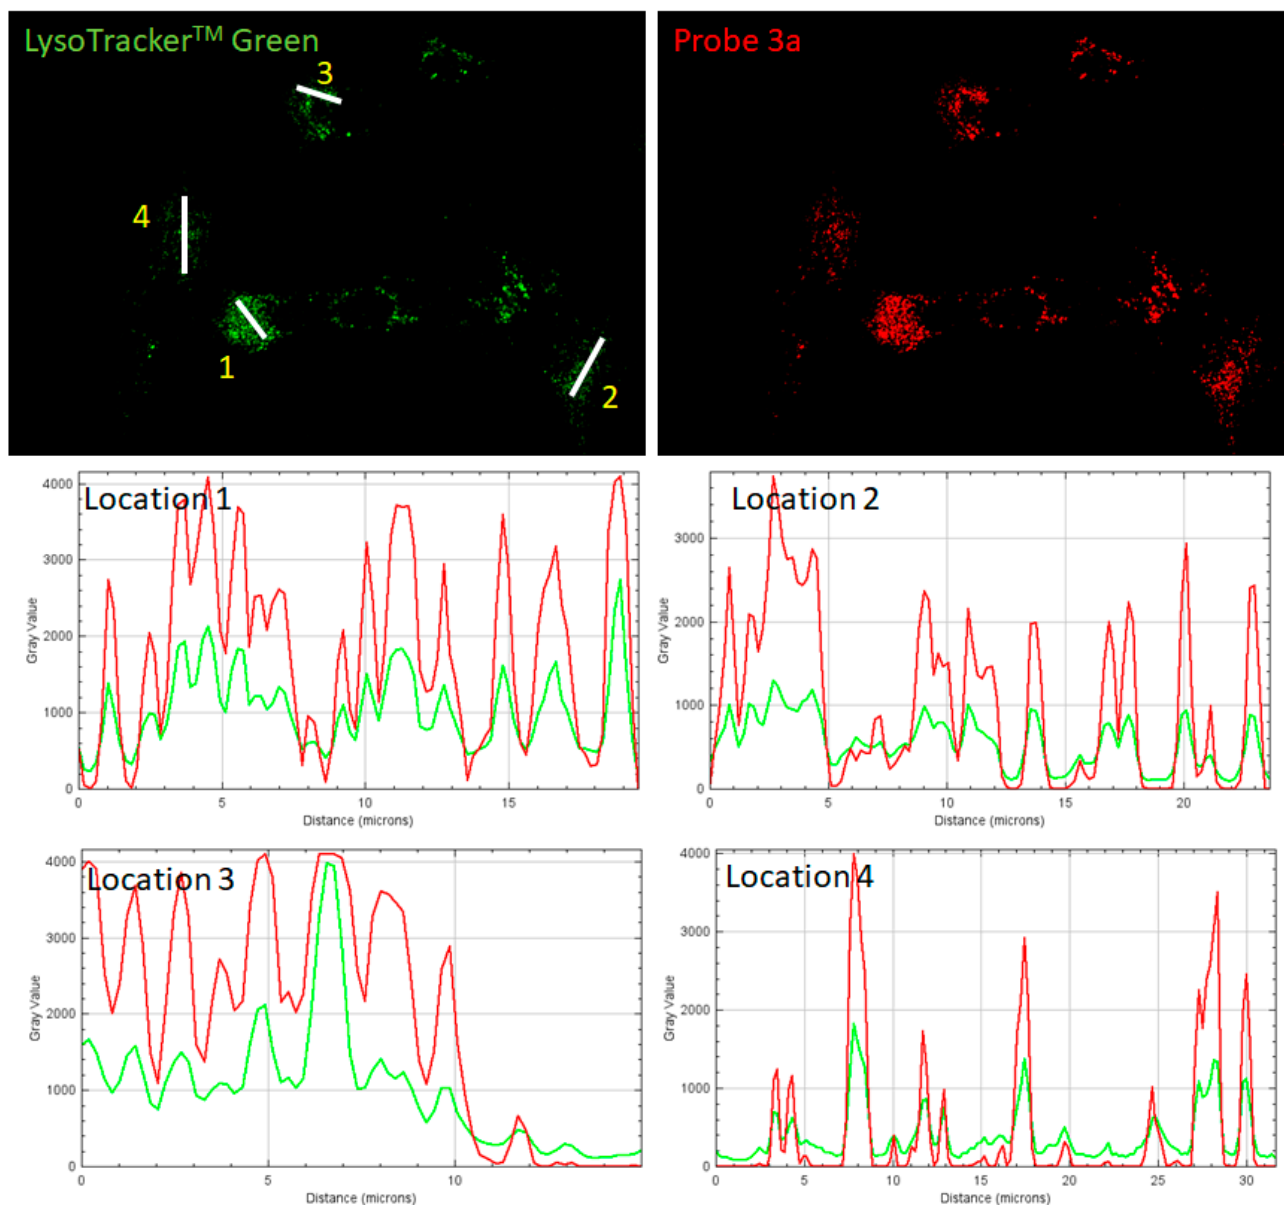

**Figure S5.8** Representative fluorescence confocal microscope images of the MO3.13 cells incubated with probe **3a** (200 nM) for 30 minutes in the presence of LysoTracker™ Green DND-26 (70 nM). Fluorescence intensity vs distance plots were obtained for selected regions (locations 1-4) to represent the co-localization pattern.

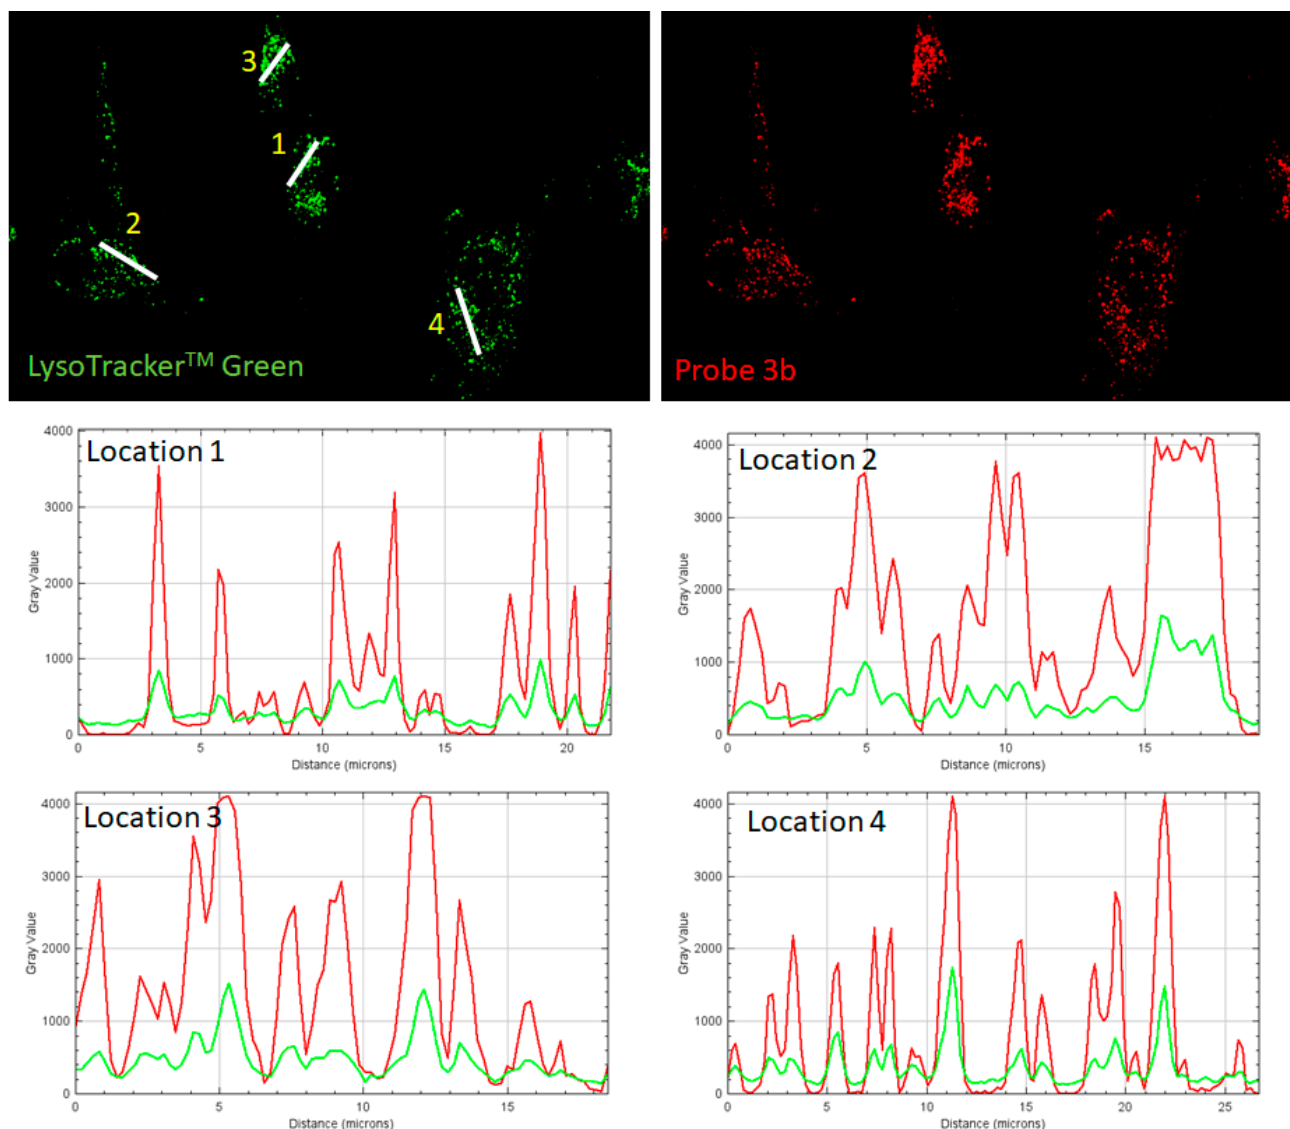

**Figure S5.9** Representative fluorescence confocal microscope images of the MO3.13 cells incubated with probe **3b** (200 nM) for 30 minutes in the presence of LysoTracker™ Green DND-26 (70 nM). Fluorescence intensity vs distance plots were obtained for selected regions (locations 1-4) to represent the co-localization pattern.

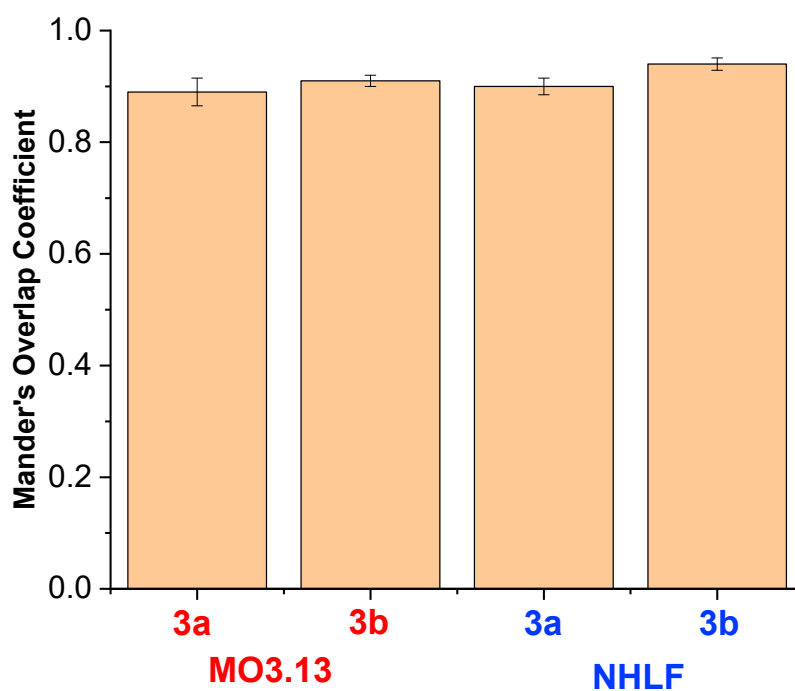

**Figure S5.10** The averaged Mander's overlap coefficient calculated for probes **3a** and **3b** in the presence of LysoTracker™ Green DND-26 in MO3.13 and NHLF cells. The averaged Mander's overlap coefficient was calculated by taking 30 individual cell samples for each entry.

**(a)**

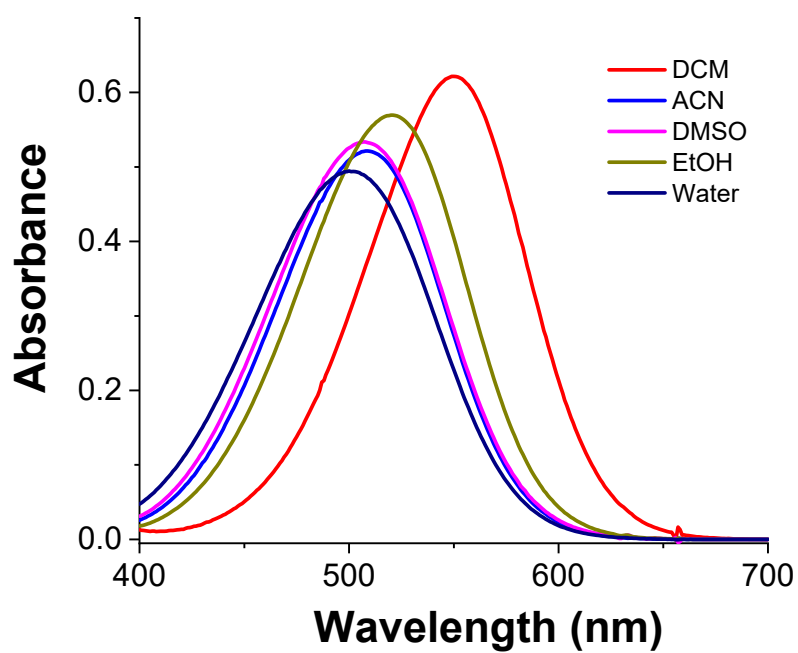

**(b)**

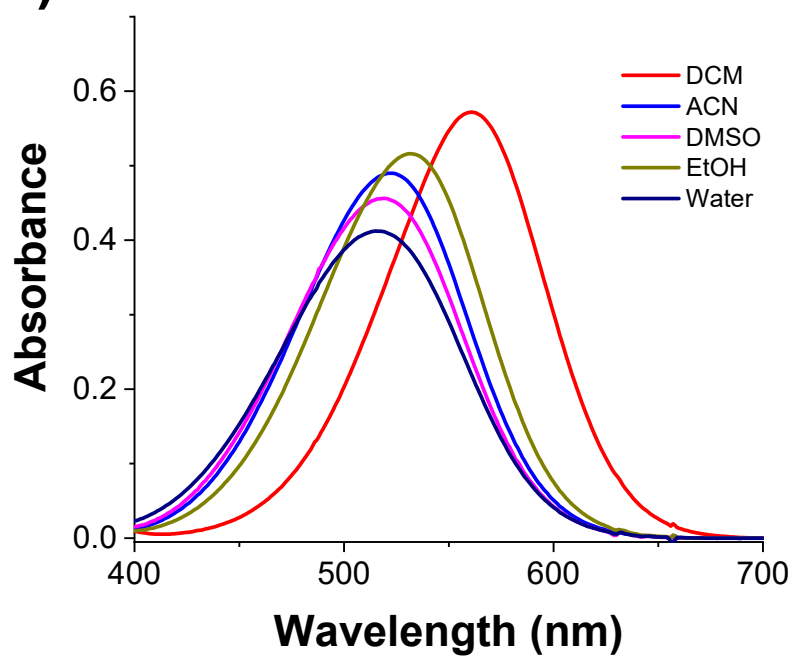

**Figure S6** Absorbance of **3a** (a) and **3b** (b) (1 × 10<sup>-5</sup> M) in different solvents at room temperature.

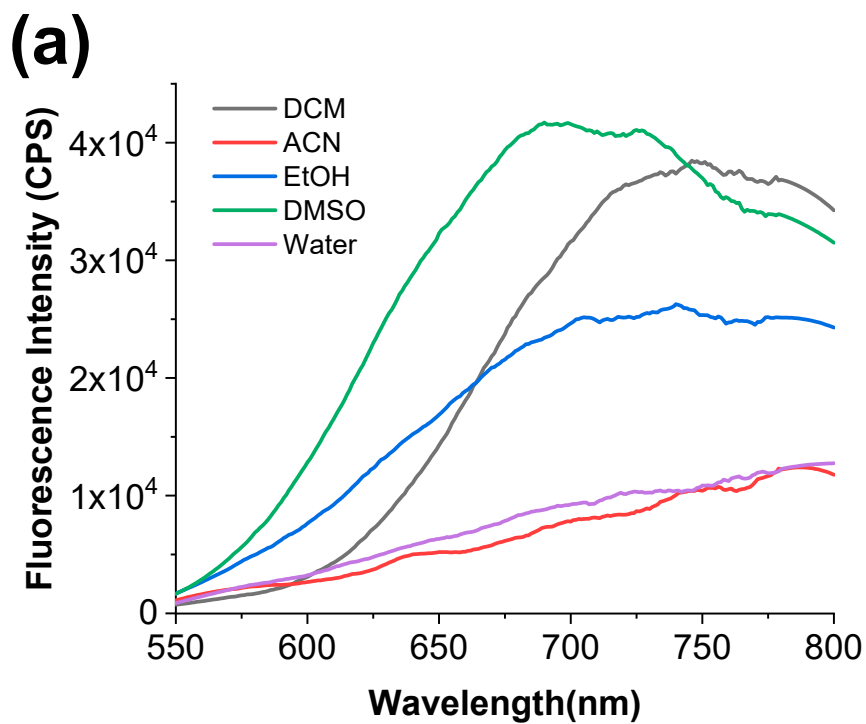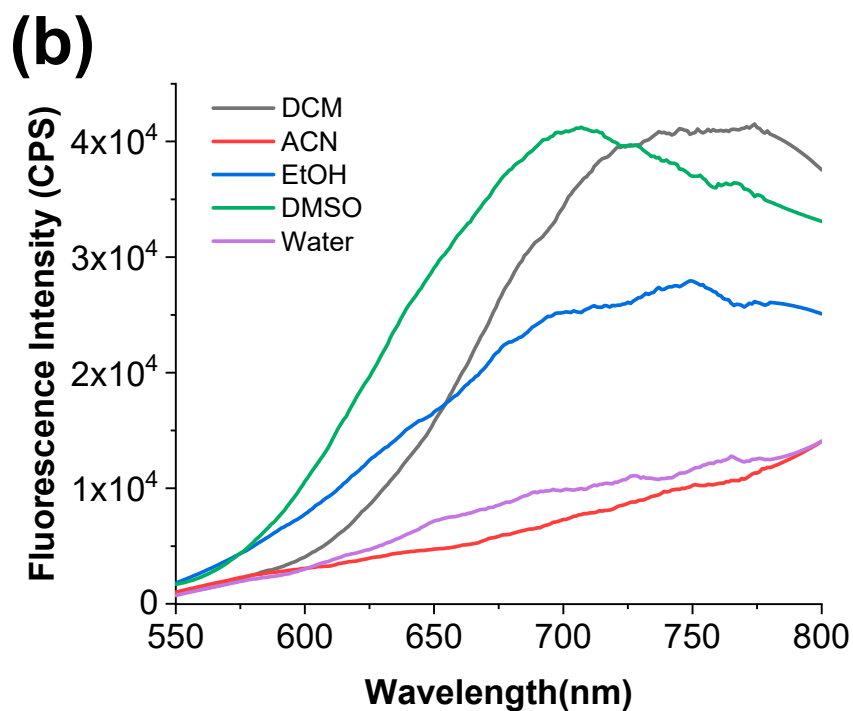

**Figure S7** Fluorescence emission of **3a** (a) and **3b** (b) ( $1 \times 10^{-5}$  M) in different solvents at room temperature. Probes were excited at 520 nm and the emissions were collected from 550 nm to 800 nm.

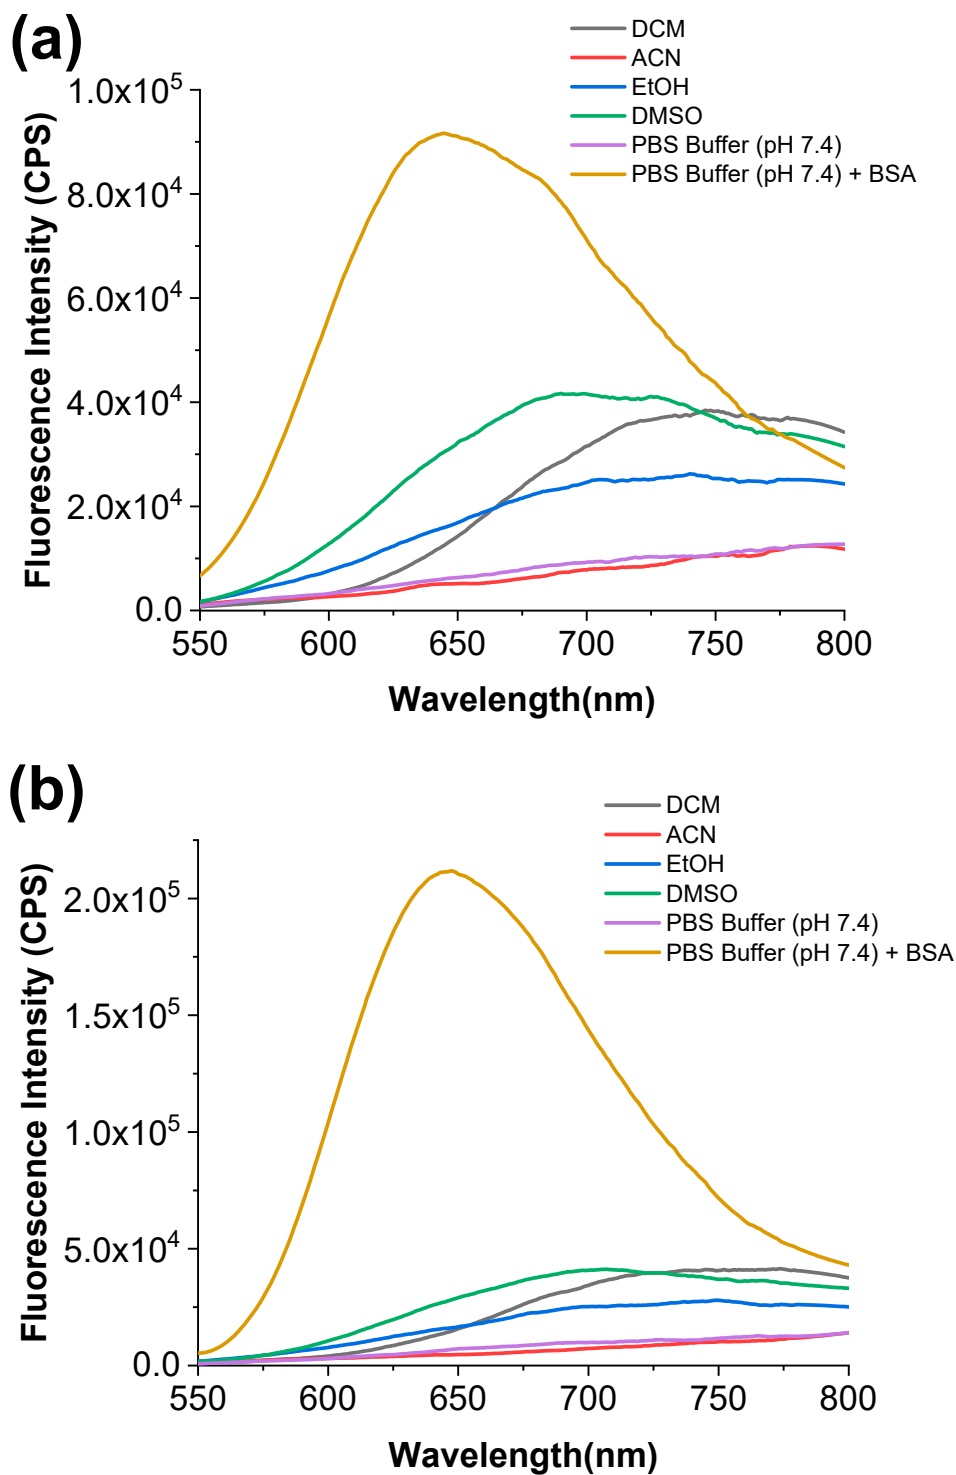

**Figure S8** Comparison of the fluorescence emission of **3a** (a) and **3b** (b) ( $1 \times 10^{-5}$  M) in different solvents with the addition of a 0.50  $\mu$ L of 10 % BSA into an aqueous solution of the probes ( $1 \times 10^{-5}$  M in PBS buffer at pH 7.4) at room temperature. Probes were excited at 520 nm and the emissions were collected from 550 nm to 800 nm.

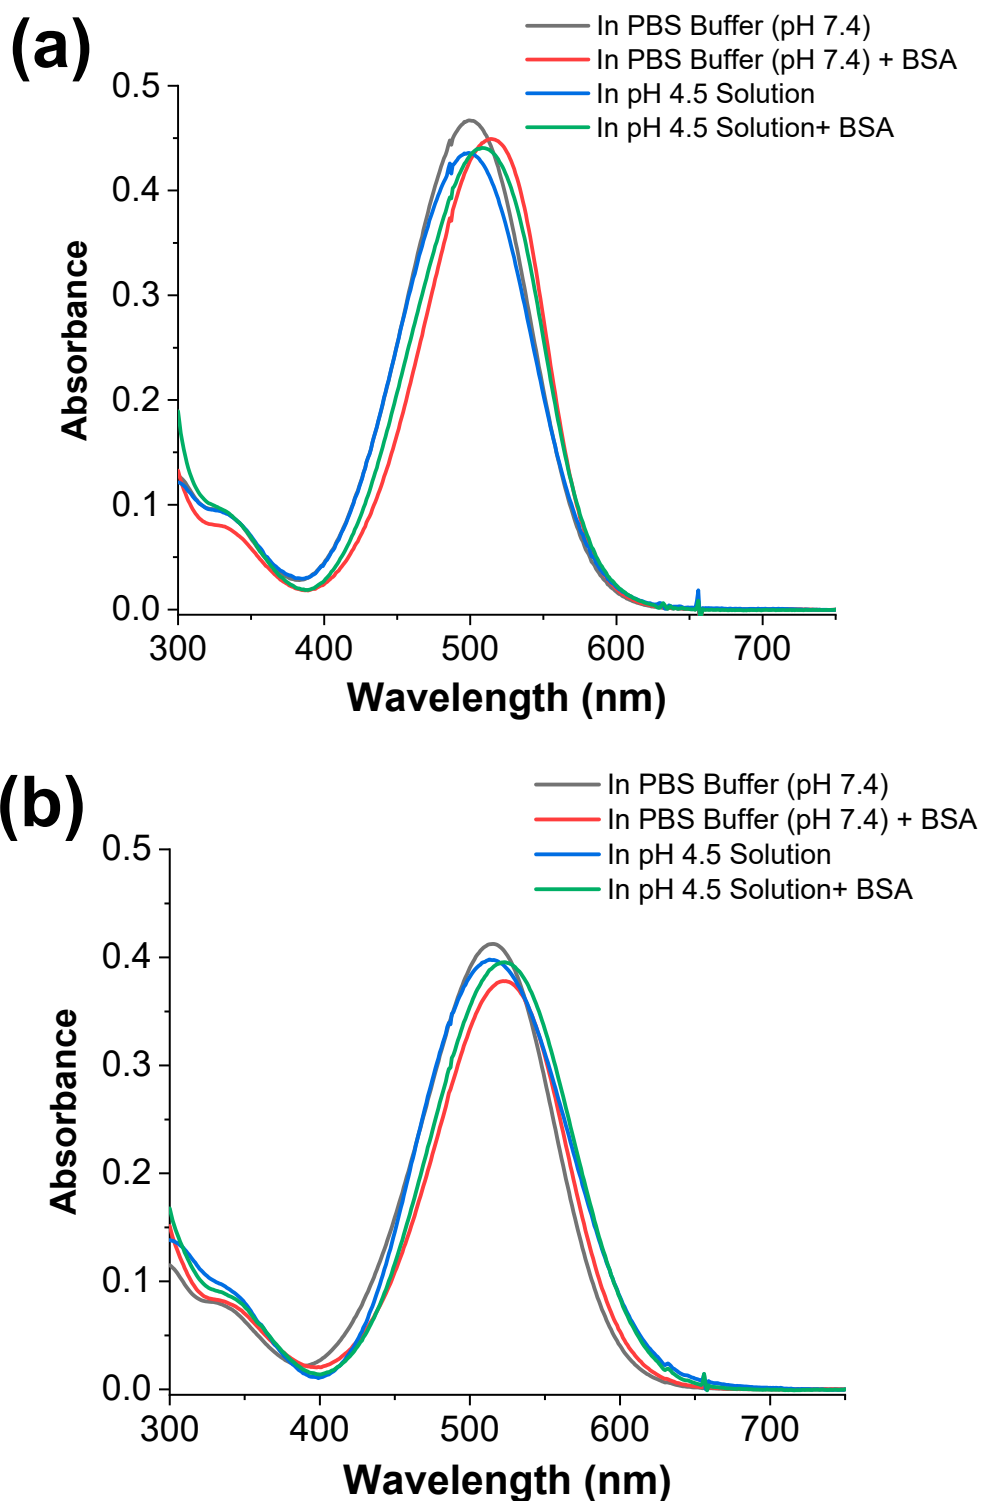

**Figure S9** Comparison of absorbance of **3a** (a) and **3b** (b) ( $1 \times 10^{-5}$  M) in different pH conditions with and without the addition of a 0.50  $\mu$ L of 10 % BSA at room temperature. Probes were excited at 520 nm and the emissions were collected from 550 nm to 800 nm.

(a)

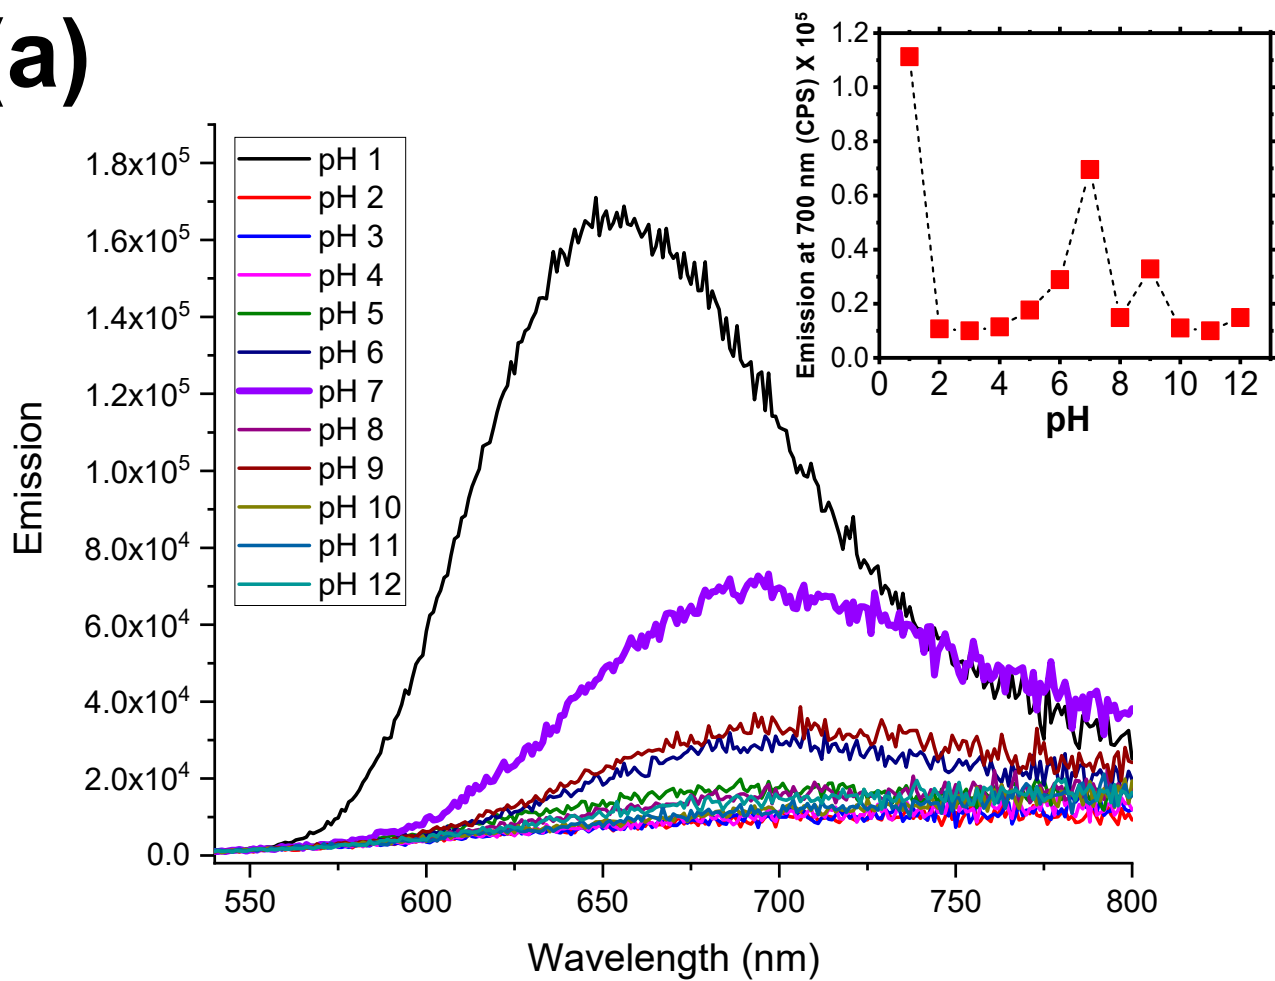

**Figure S10.1** The emission spectra recorded for **3a** ( $1 \times 10^{-5}$  M) in different pH conditions at room temperature. Probes were excited at 510 nm and the emissions were collected from 550 nm to 800 nm.



(b)

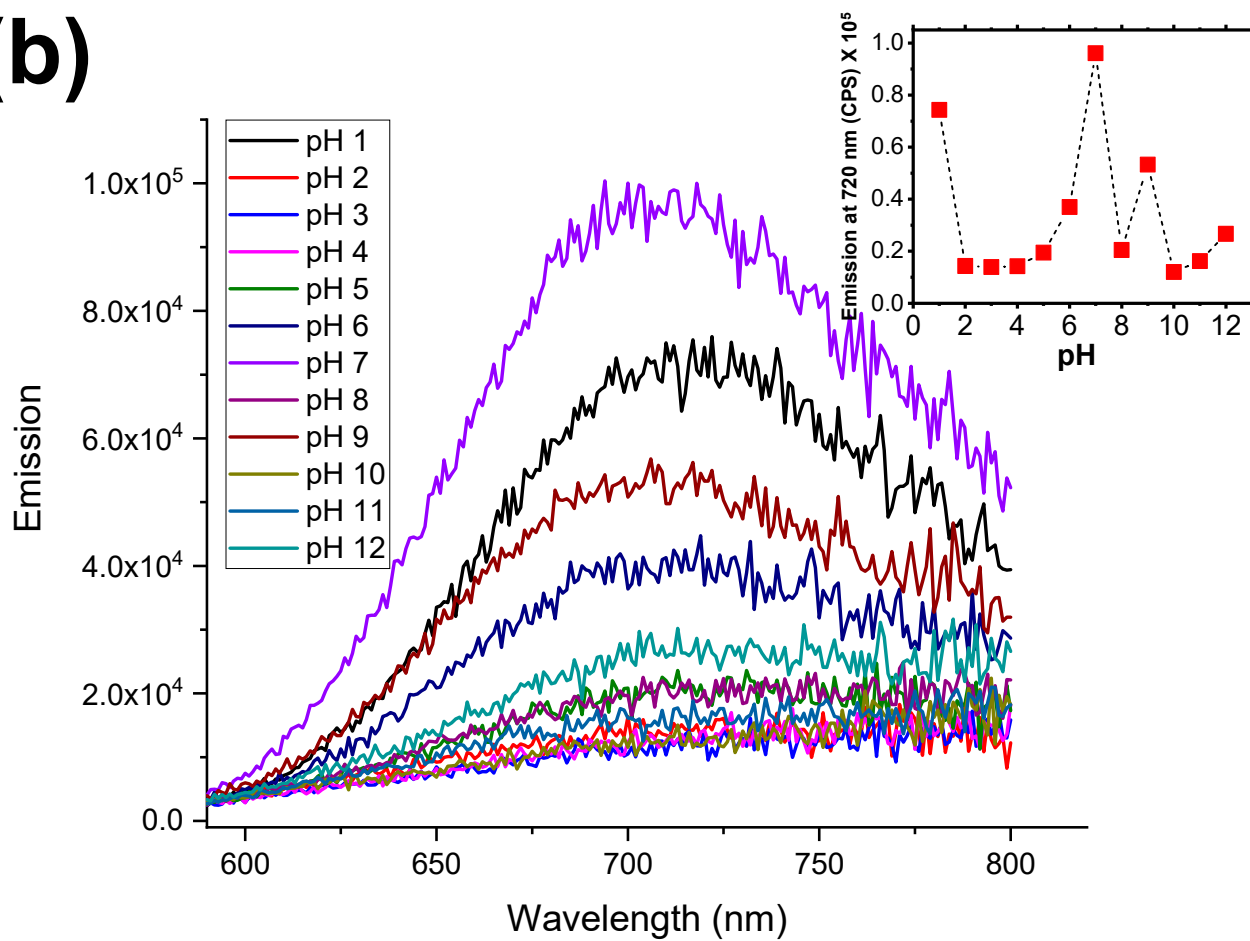

**Figure S10.2** The emission spectra recorded for **3b** ( $1 \times 10^{-5}$  M) in different pH conditions at room temperature. Probes were excited at 510 nm and the emissions were collected from 550 nm to 800 nm.

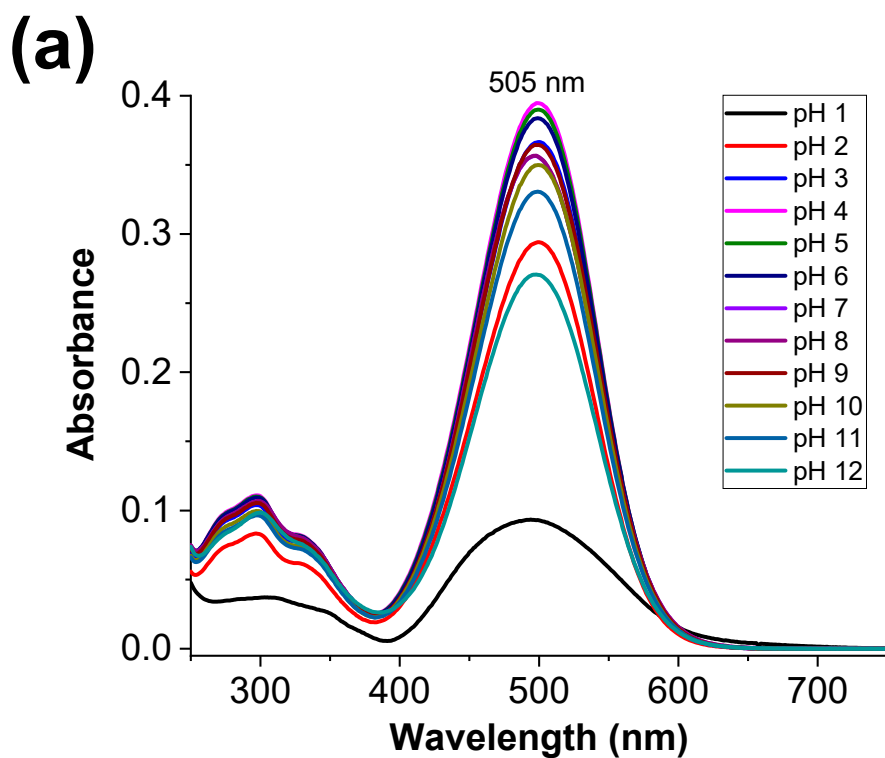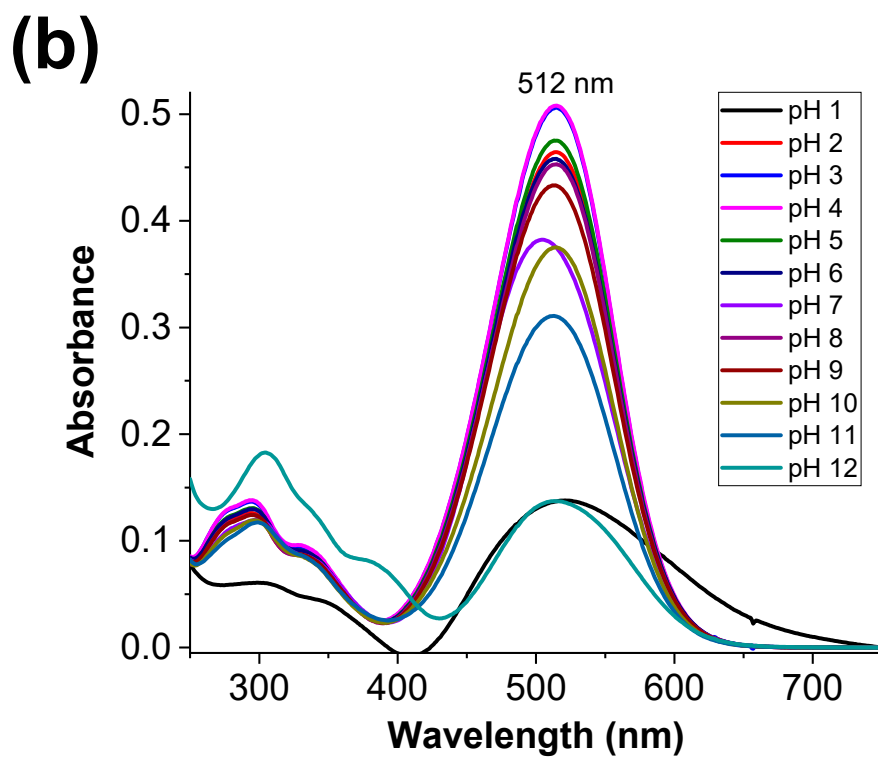

**Figure S11** The absorbance spectra recorded for **3a** (a) and **3b** (b) ( $1 \times 10^{-5}$  M) in different pH conditions at room temperature.

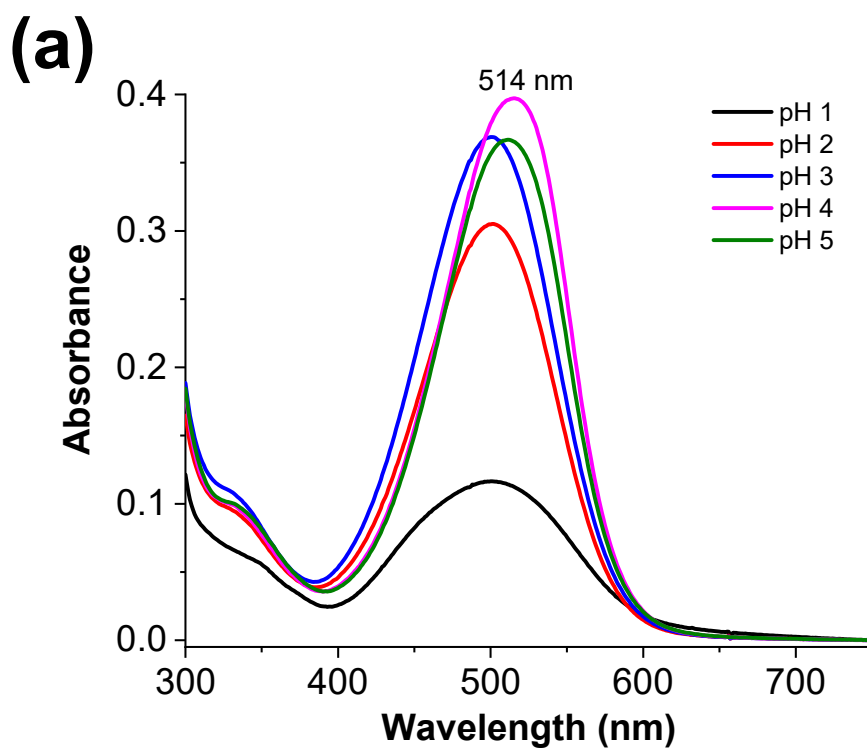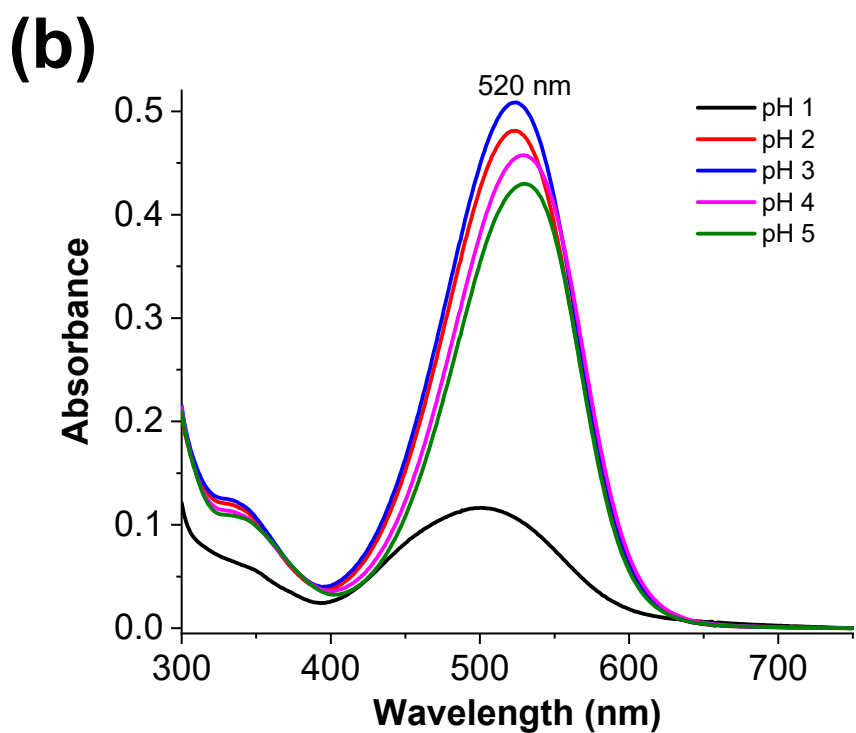

**Figure S12** The absorbance spectra recorded for **3a** (a) and **3b** (b) ( $1 \times 10^{-5}$  M) in different pH conditions at room temperature upon addition of 10  $\mu$ L of 10% HSA.

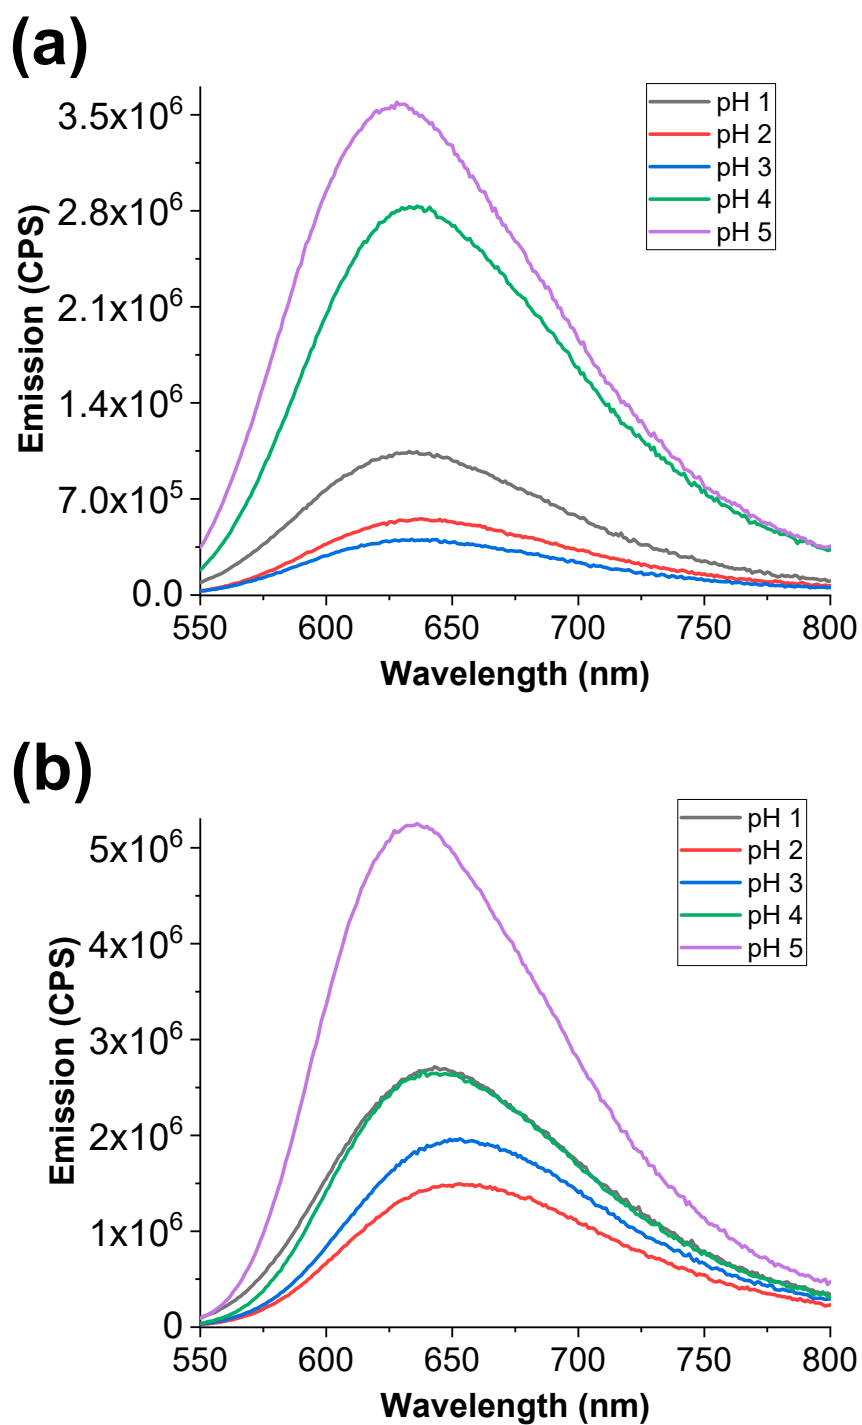

**Figure S13** The emission spectra recorded for **3a** (a) and **3b** (b) ( $1 \times 10^{-5}$  M) in different pH conditions at room temperature upon addition of 10  $\mu$ L of 10% HSA. Probes were excited at 510 nm and the emissions were collected from 550 nm to 800 nm.

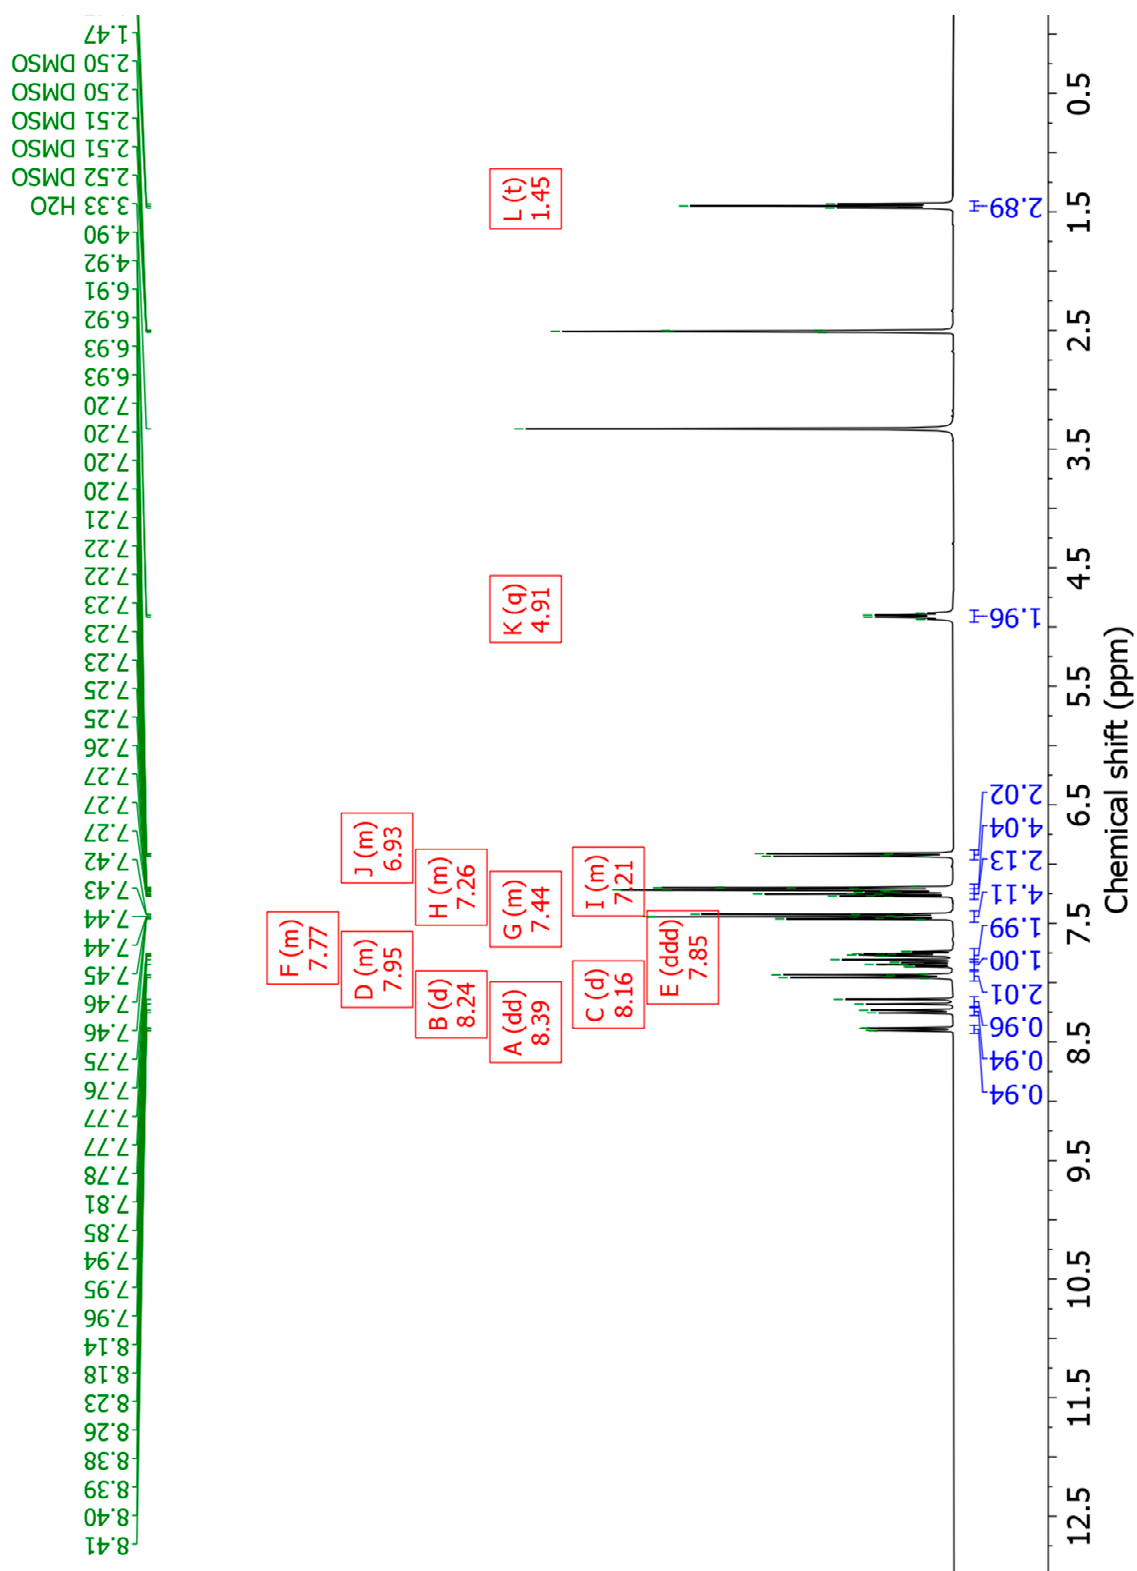

**Figure S14.1**  $^1\text{H}$  NMR spectrum of probe **3a** in  $\text{DMSO-}d_6$  (400 MHz).

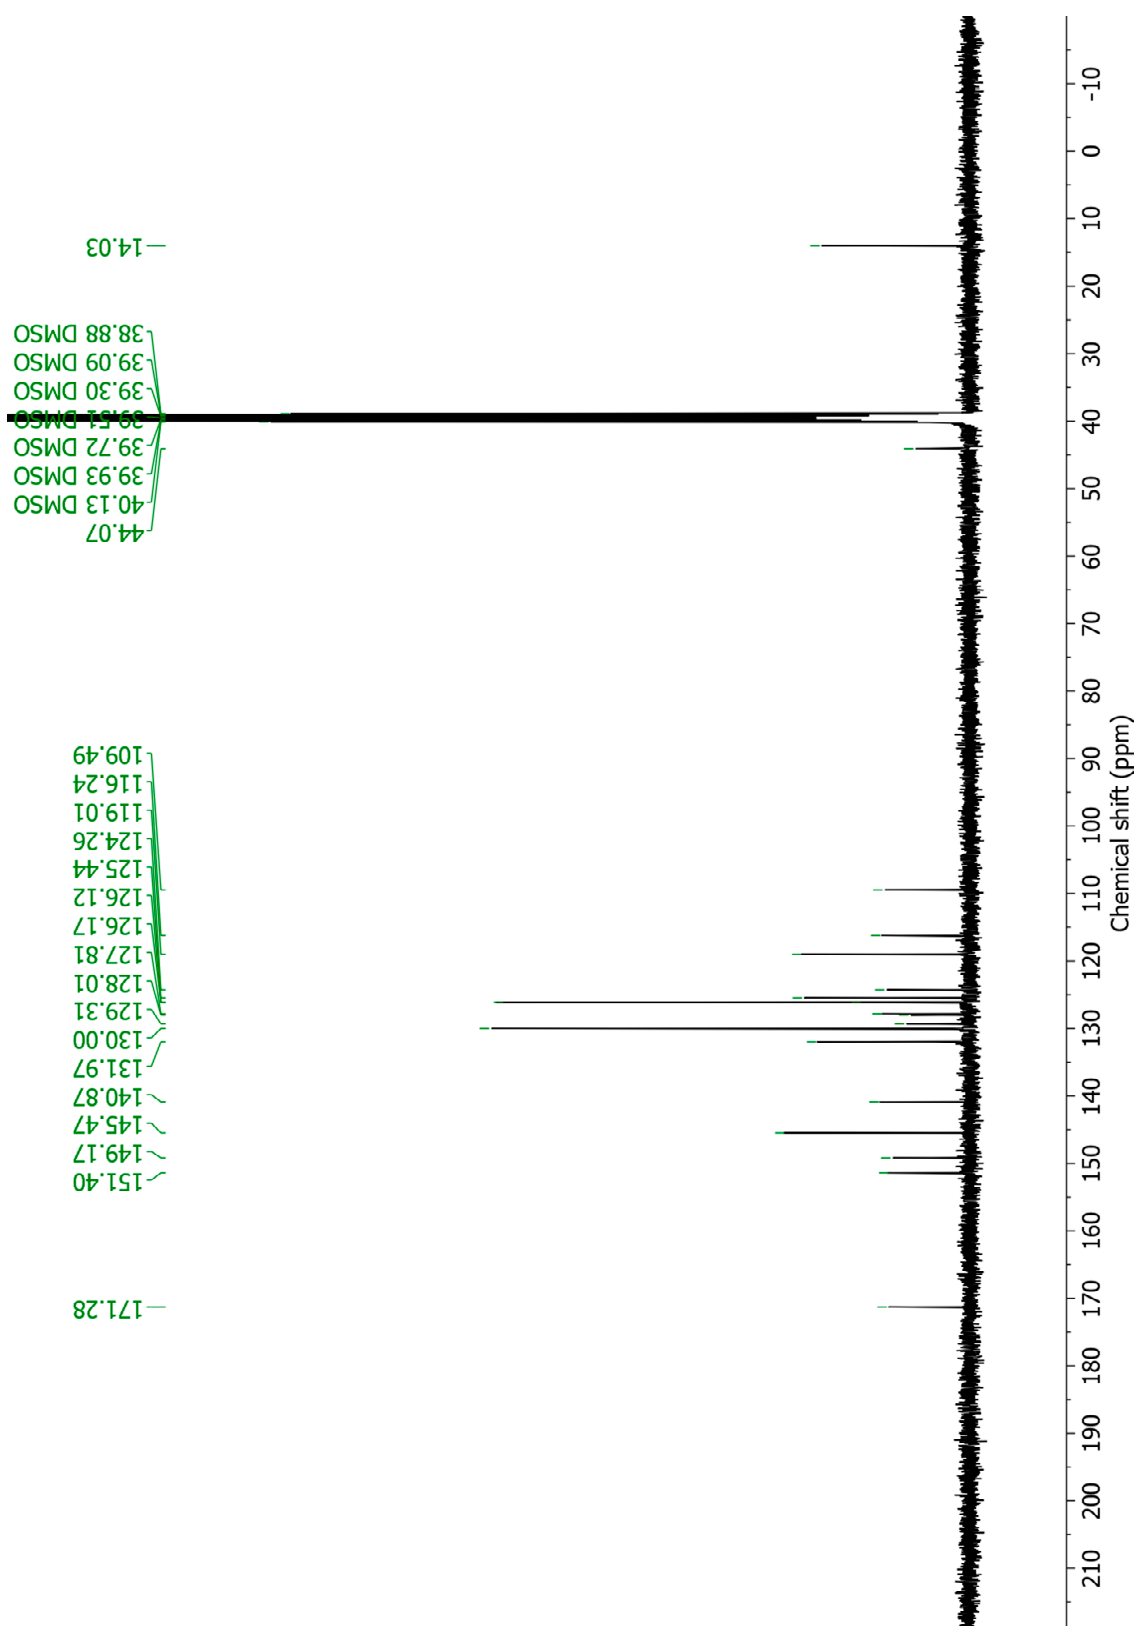

**Figure S14.2** <sup>13</sup>C NMR spectrum of probe **3a** in DMSO-*d*<sub>6</sub> (400 MHz).

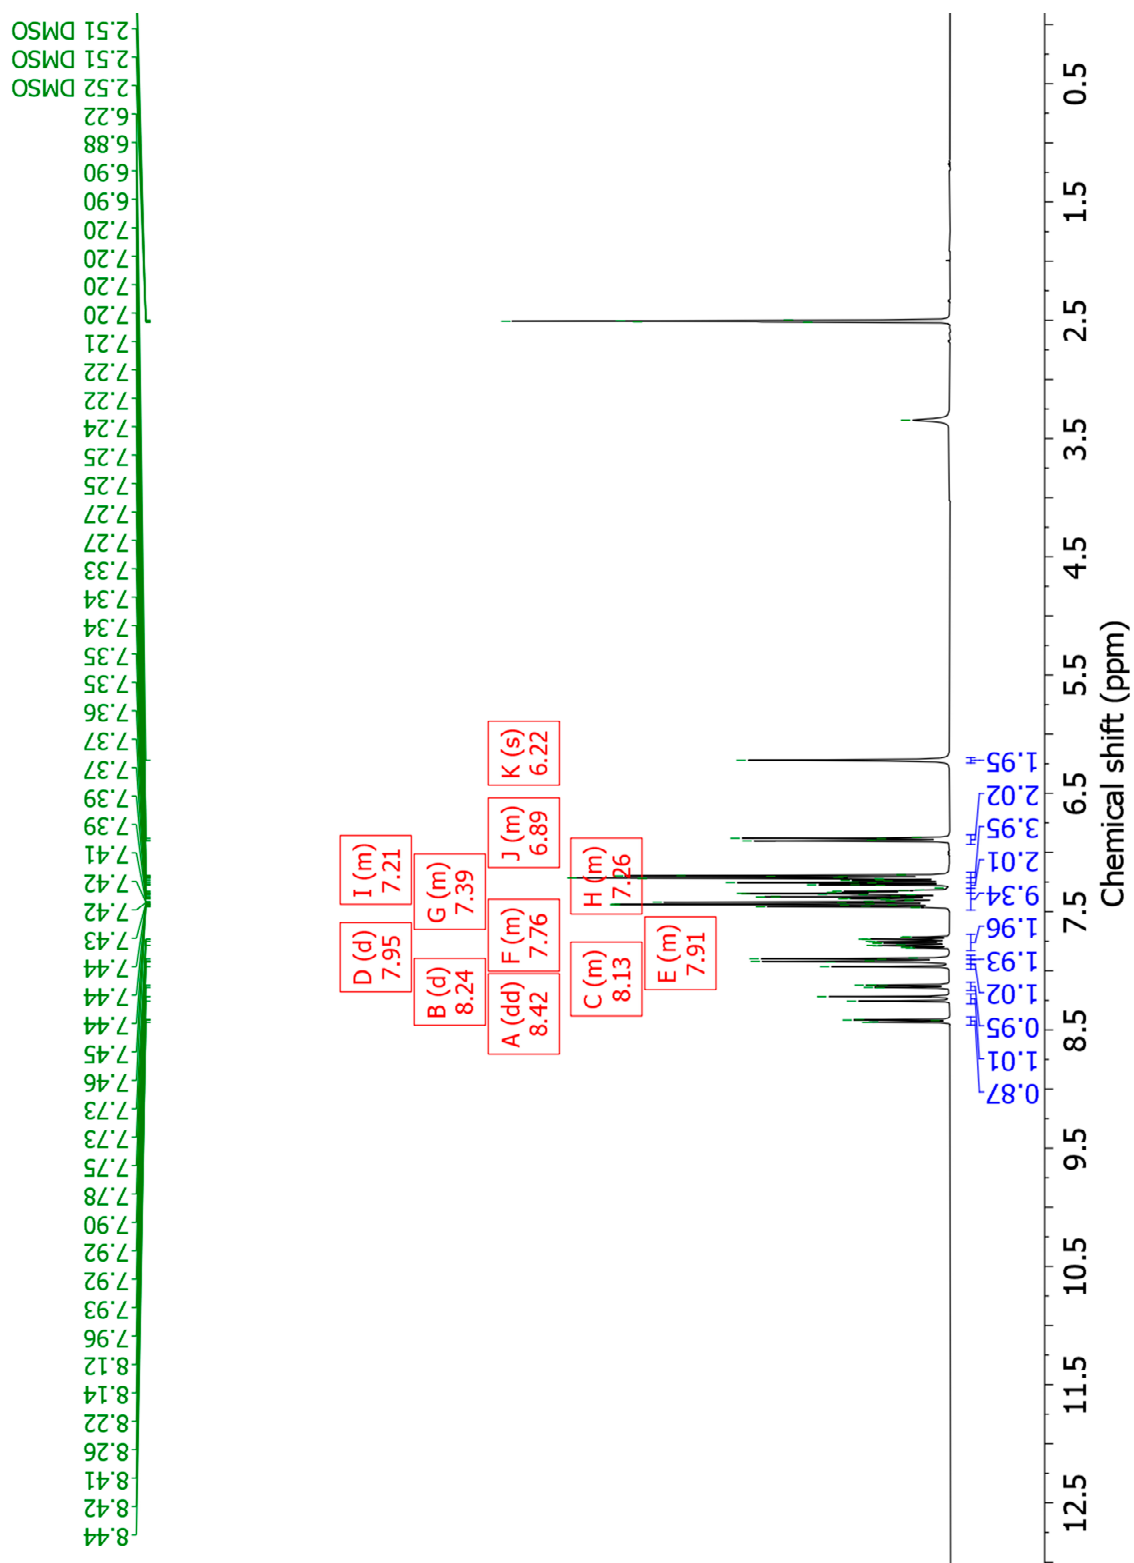

**Figure S14.3**  $^1\text{H}$  NMR spectrum of probe **3b** in  $\text{DMSO-}d_6$  (400 MHz).

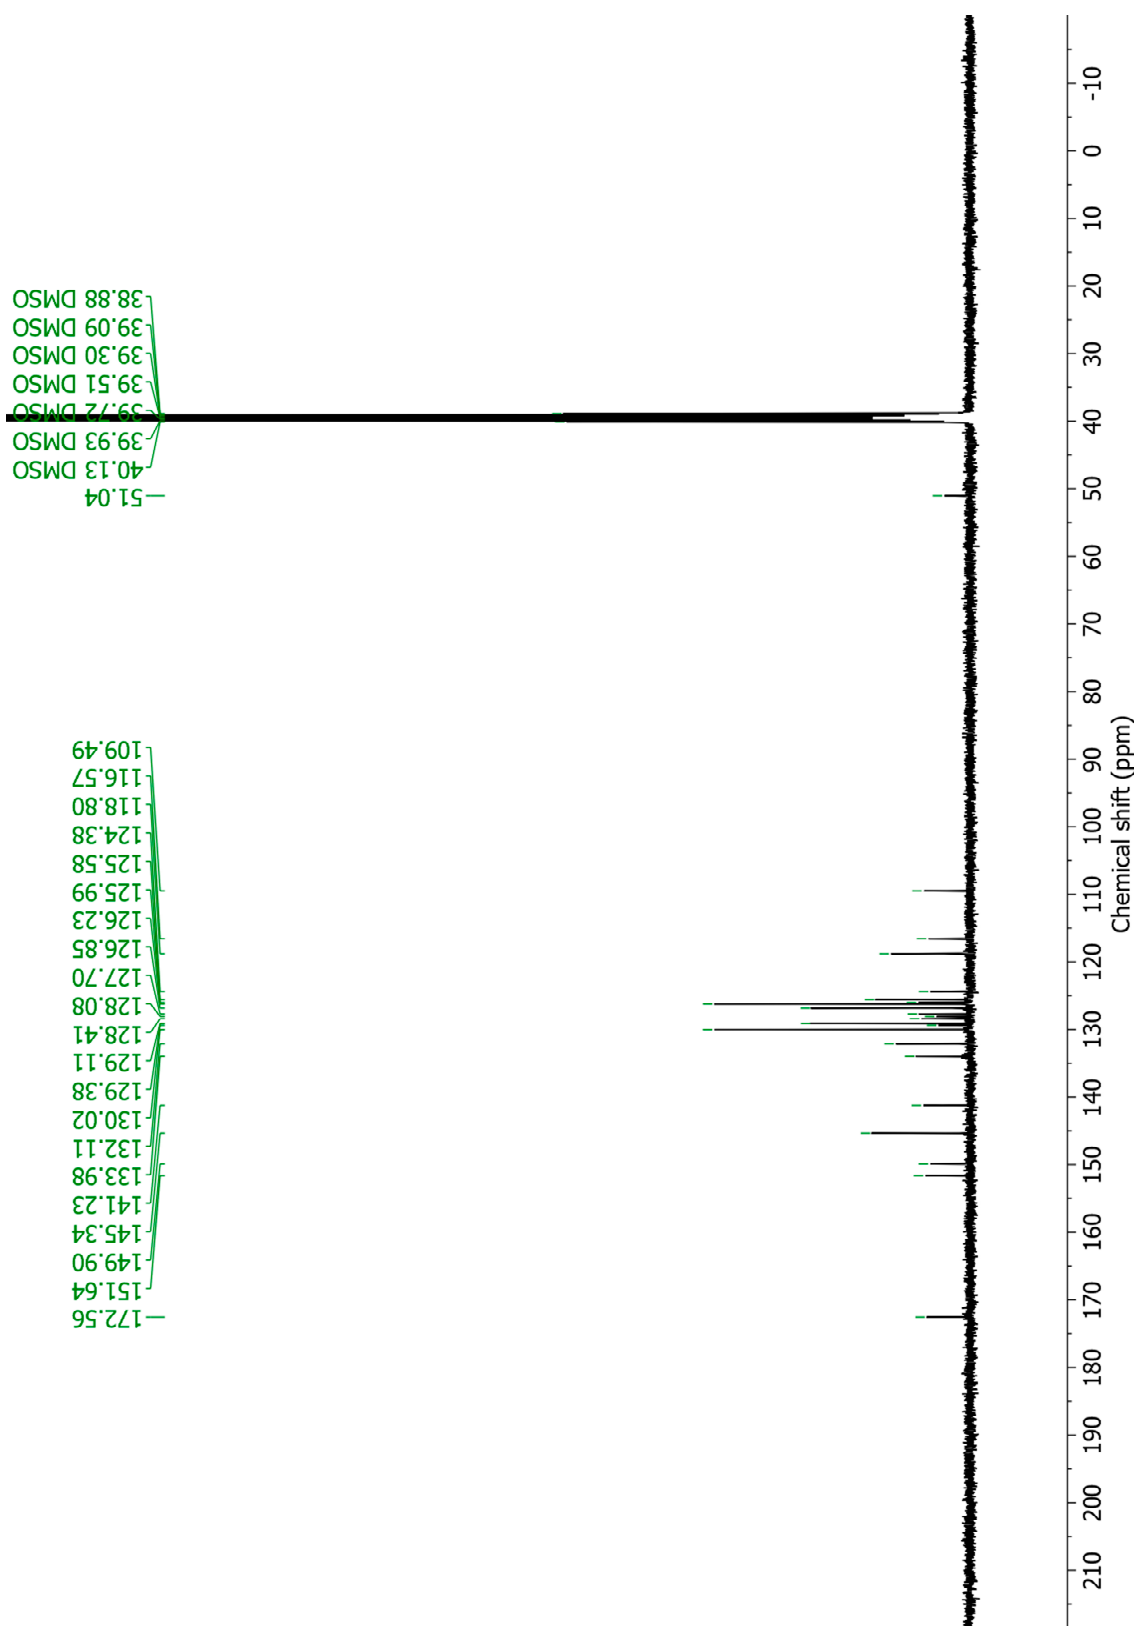

**Figure S14.4** <sup>13</sup>C NMR spectrum of probe **3b** in DMSO-*d*<sub>6</sub> (400 MHz).



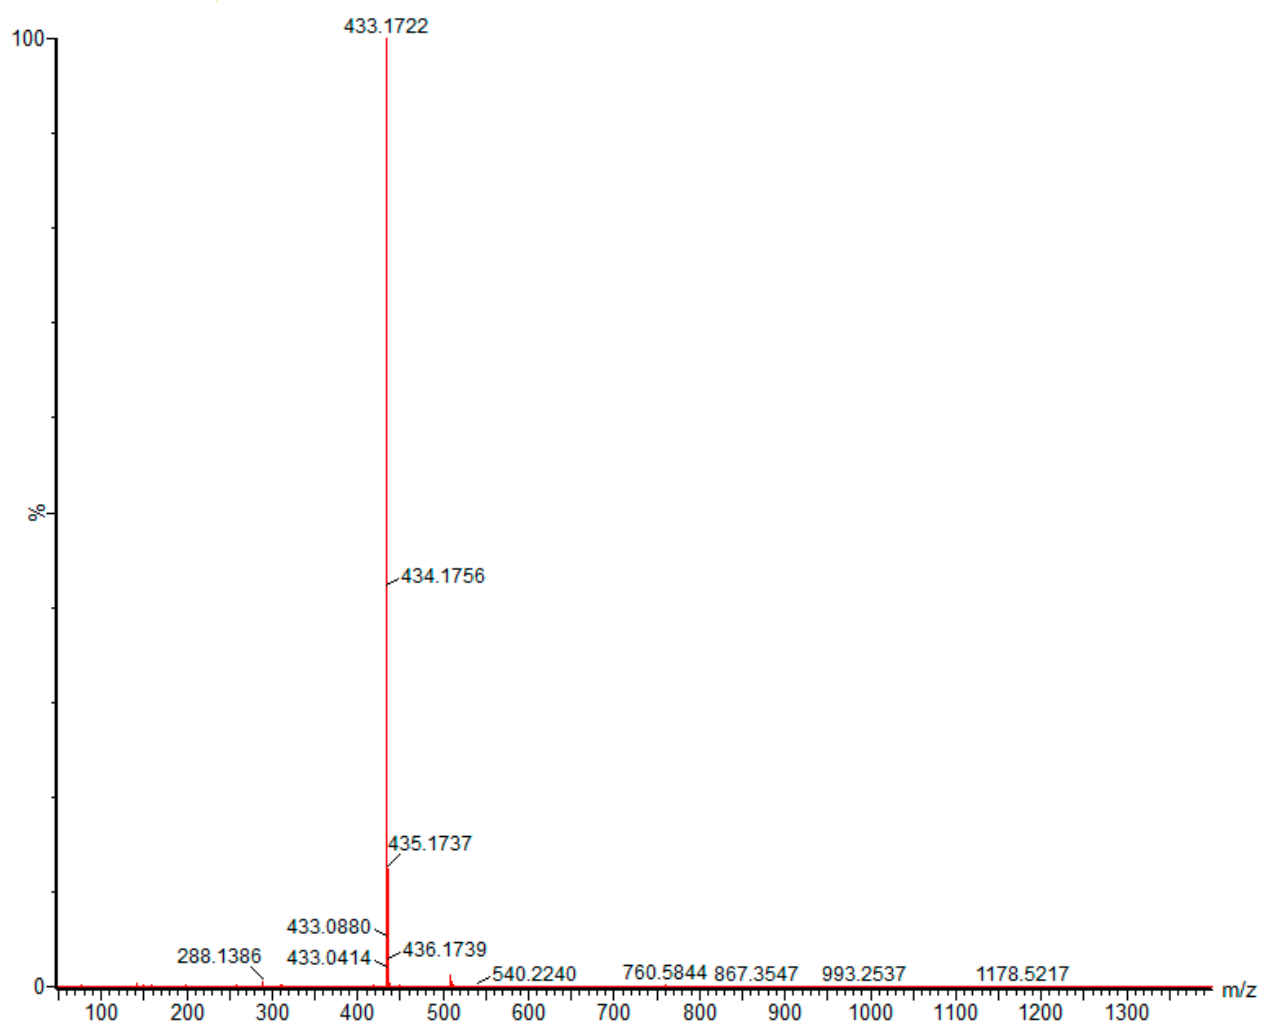

**Figure S14.5** High-resolution mass spectra (TOF MS ES+) of **3a** (Molecular Formula:  $[C_{29}H_{25}N_2S]^+$ ). The calculated error is -2.54 ppm

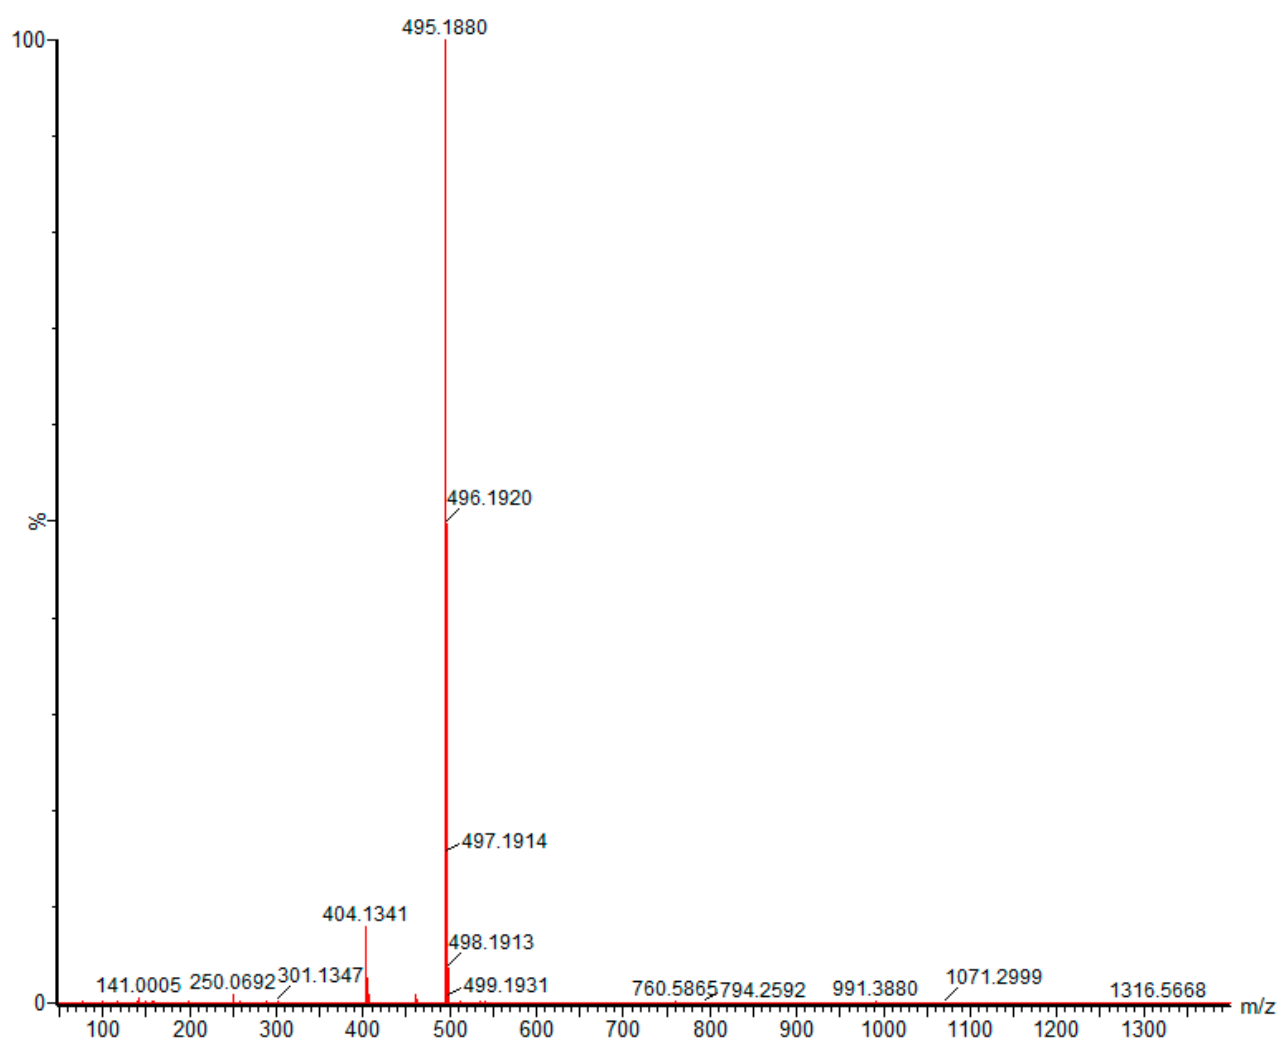

**Figure S14.6** High-resolution mass spectra (TOF MS ES+) of **3b** (Molecular Formula:  $[C_{34}H_{27}N_2S]^+$ ). The calculated error is -1.82 ppm.
